# Supplementary material for: Nanoparticles Surface Chemistry Influence on Protein Corona Composition and Inflammatory Responses
Source: MDPI journal article supplement (doi:10.3390/nano12040682), 2022-02-18
Supplement: s1 [file s1]

# Nanoparticles Surface Chemistry Influence on Protein Corona Composition and Inflammatory Responses

**Laura E. González-García<sup>1</sup>, Melanie N. MacGregor<sup>1,2,\*</sup>, Rahul M. Visalakshan<sup>1</sup>, Artur Lazarian<sup>3</sup>, Alex A. Cavallaro<sup>1</sup>, Svenja Morsbach<sup>3</sup>, Agnieszka Mierczynska-Vasilev<sup>4</sup>, Volker Mailänder<sup>3,5</sup>, Katharina Landfester<sup>3</sup> and Krasimir Vasilev<sup>1,6,\*</sup>**

<sup>1</sup> UniSA STEM, Future Industries Institute, University of South Australia, Mawson Lakes, SA 5095, Australia; laura.gonzalez\_garcia@mymail.unisa.edu.au (L.E.G.-G.); rahul.madathiparambil\_visalakshan@mymail.unisa.edu.au (R.M.V.); alex-anthony.cavallaro@unisa.edu.au (A.A.C.)

<sup>2</sup> Flinders Institute for Nanoscale Science & Technology, College of Science and Engineering, Flinders University, Bedford Park, SA 5042, Australia

<sup>3</sup> Max Planck Institute for Polymer Research, Ackermannweg 10, 55128 Mainz, Germany; lazarian@mpip-mainz.mpg.de (A.L.); morsbachs@mpip-mainz.mpg.de (S.M.); mailaend@mpip-mainz.mpg.de (V.M.); landfest@mpip-mainz.mpg.de (K.L.)

<sup>4</sup> The Australian Wine Research Institute, Waite Precinct, Hartley Grove cnr Paratoo Road, Urrbrae, SA 5064, Australia; agnieszka.mierczynska@awri.com.au

<sup>5</sup> Department of Dermatology, University Medical Center of the Johannes Gutenberg-University Mainz, Langenbeckstr. 1, 55131 Mainz, Germany

<sup>6</sup> College of Medicine and Public Health, Flinders University, Sturt Road, Bedford Park, SA 5042, Australia

\* Correspondence: melanie.macgregor@flinders.edu.au (M.N.M.); krasimir.vasilev@unisa.edu.au (K.V.)

---

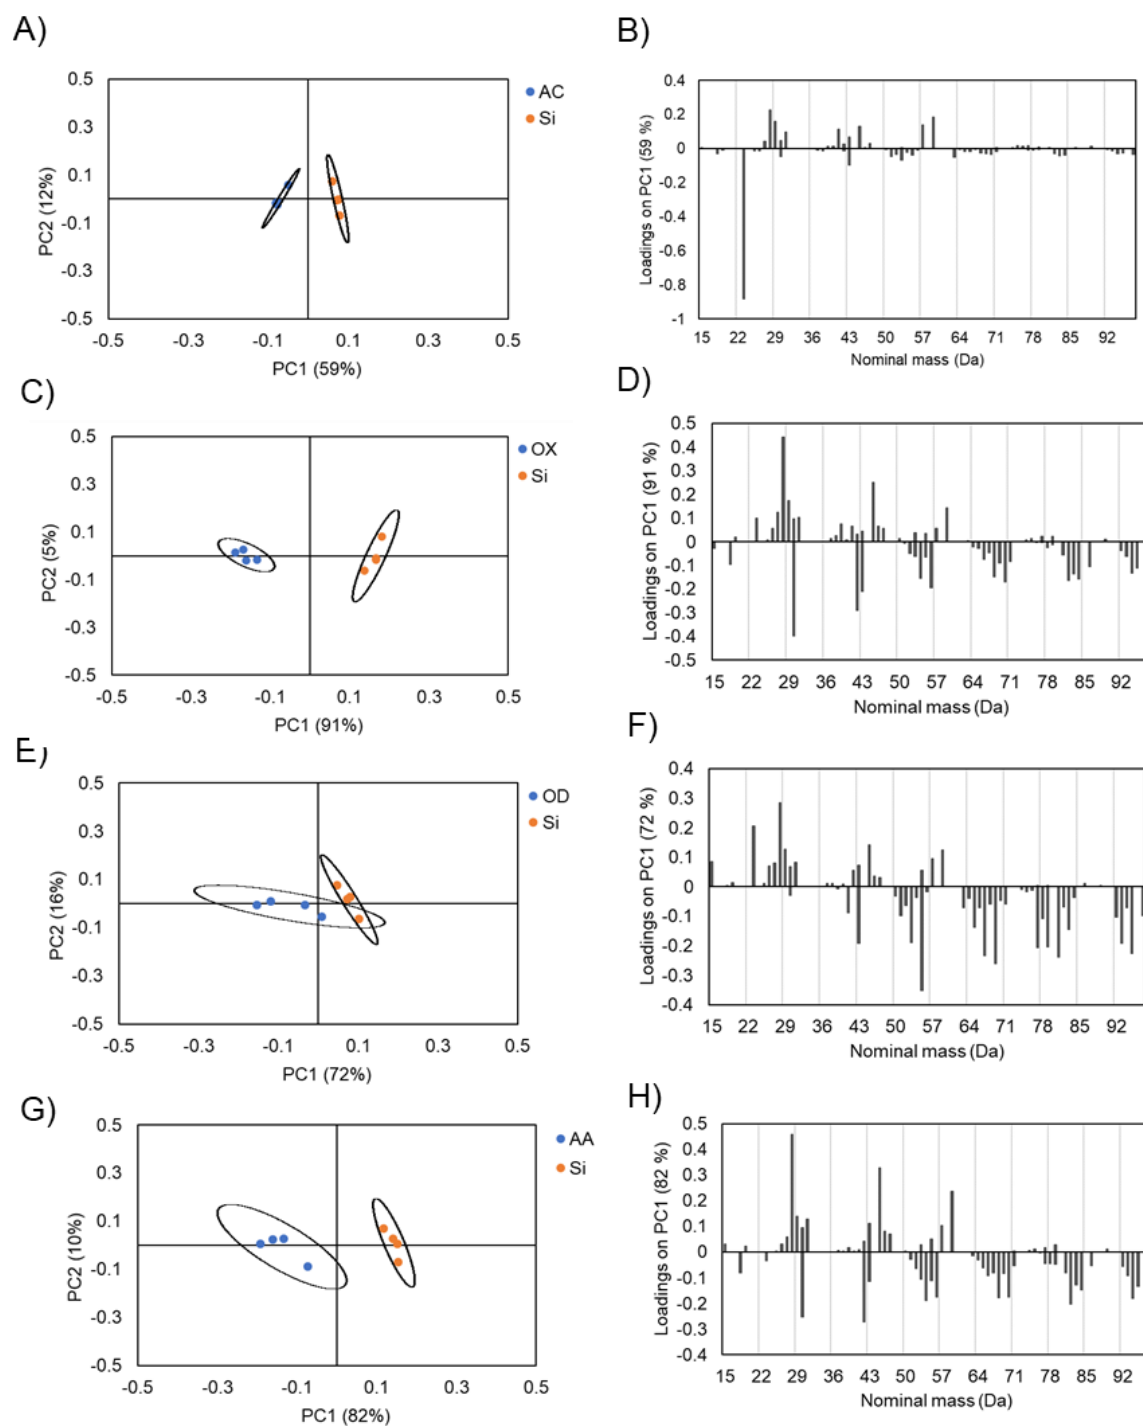

**Figure S1.** Principal component analysis of ToF-SIMS characterization data showing discrimination of bare SiO<sub>2</sub> and plasma polymer functionalities for AC A) OX C) OD E) and AA G). TOF-SIMS PC1 loadings for all fragments below 100m/z for AC B) OX D) OD F) and AA H).

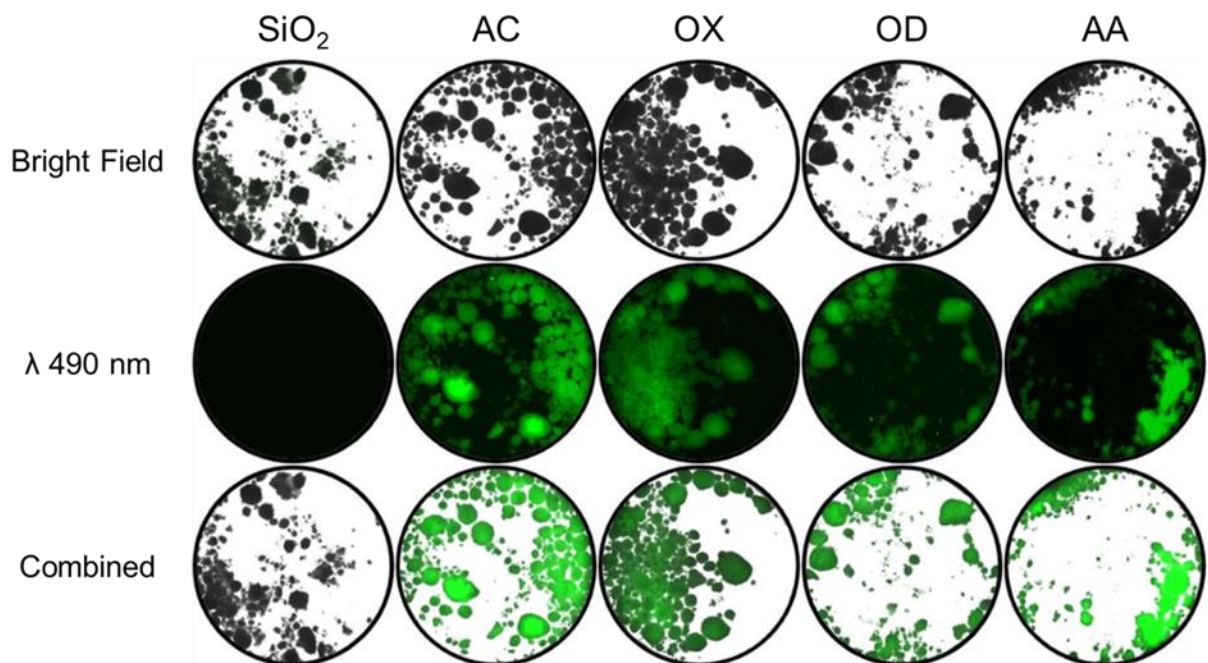

**Figure S2.** Autofluorescence analysis of Plasma polymer coated silica nanoparticles in bulk. Polymer coatings shown as green in signal channel and combined images.

The success of the nanoparticle functionalisation was first validated via fluorescence microscopy. Indeed, plasma polymers are rich in double bonds, a singular chemistry conferred by the ions and radicals present in the plasma phase during film deposition. The unsaturation and autofluorescence phenomena is related to the abstraction of radical  $H^{\bullet}$  from monomer precursors and subsequent radical self-quenching [77]. Plasma polymers autofluorescence has previously been used by others to determine the chemical stability of plasma coatings [78]. Fluorescence microscopy therefore constitute a swift approach to corroborate the presence of plasma polymer coatings on the nanoparticles. In bright field images, all nanoparticles appear black. Following excitation at 490 nm, the autofluorescence of bulk plasma modified particles  $SiO_2$  nanoparticles (PPSiNP) is green, while the bare SiNP are not visible. The merged images of both optical channels shown in Figure S2 confirm the successful coating of the nanoparticles with AC, OX, OD and AA.

A)

| Si  |             |             |             |             |    |
|-----|-------------|-------------|-------------|-------------|----|
| AC  | 288 (97.3%) |             |             |             |    |
| POX | 287 (97.6%) | 293 (99.0%) |             |             |    |
| OD  | 288 (98.6%) | 292 (98.6%) | 290 (98.3%) |             |    |
| AA  | 285 (97.9%) | 287 (96.6%) | 286 (96.9%) | 287 (98.0%) |    |
|     | Si          | AC          | OX          | OD          | AA |

B)

| Si  |             |             |             |             |    |
|-----|-------------|-------------|-------------|-------------|----|
| AC  | 288 (97.3%) |             |             |             |    |
| POX | 287 (97.6%) | 293 (99.0%) |             |             |    |
| OD  | 288 (98.6%) | 292 (98.6%) | 290 (98.3%) |             |    |
| AA  | 285 (97.9%) | 287 (96.6%) | 286 (96.9%) | 287 (98.0%) |    |
|     | Si          | AC          | OX          | OD          | AA |

**Figure S3.** Relational table of the identified proteins in the plasma A) and serum B) coronas of all five bare and surface modified silica nanoparticles.

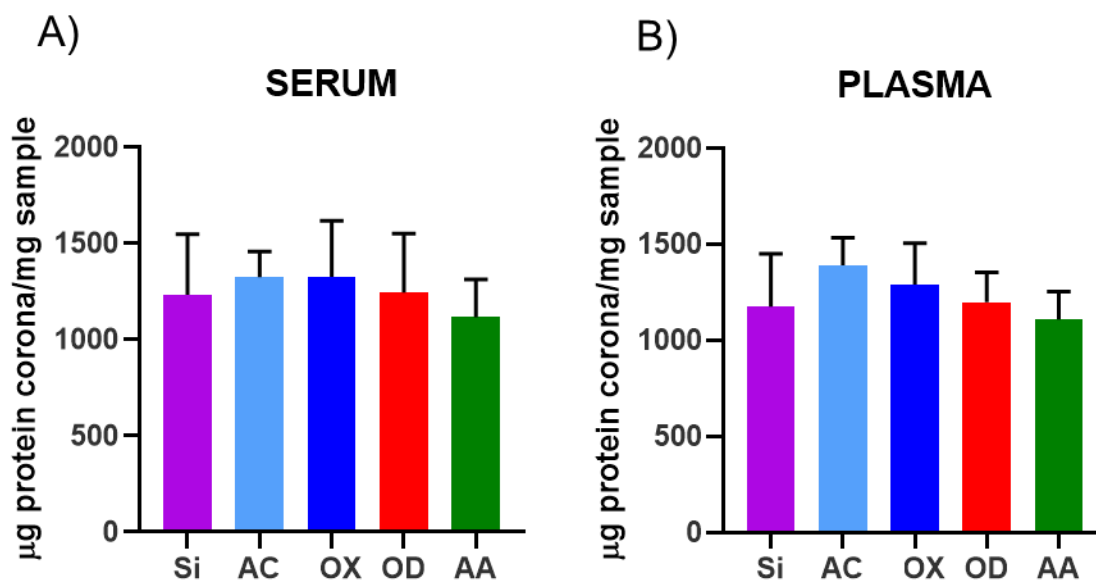

**Figure S4.** Total proteins desorbed from the coronas of the bare and modified silica nanoparticles quantified by Pierce assay on Serum A) and Plasma B).

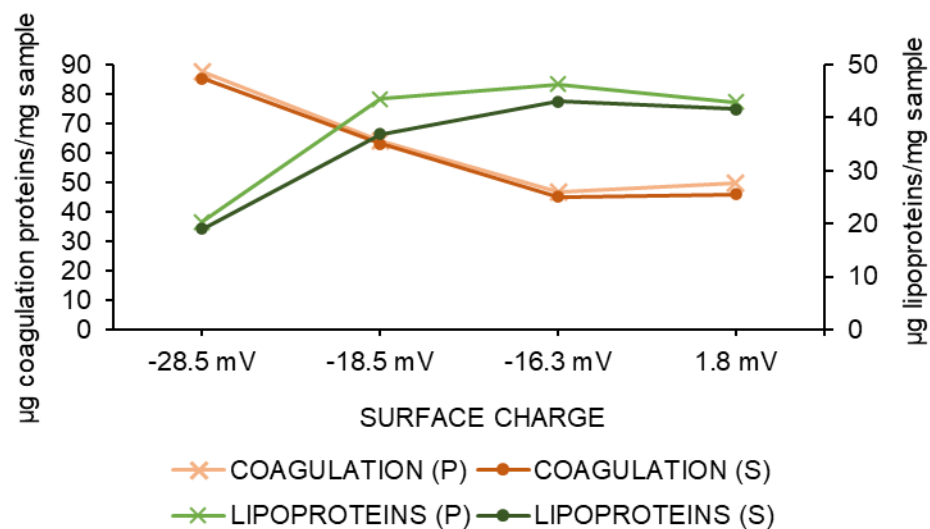

**Figure S5.** Relation of amount of coagulation proteins and lipoproteins adsorbed on the particles corona from plasma (P) and serum (S) with the nanoparticles surface charge.

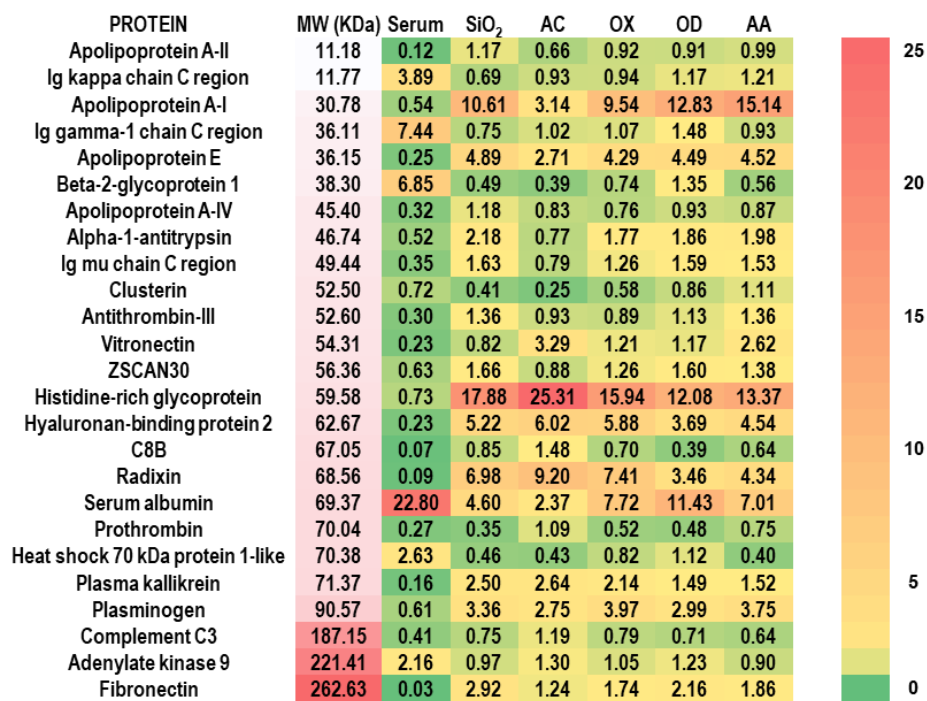

**Figure S6.** Heat map of major protein components of serum protein corona formed on PPSiNPs sorted against increasing protein molecular weight (MW).

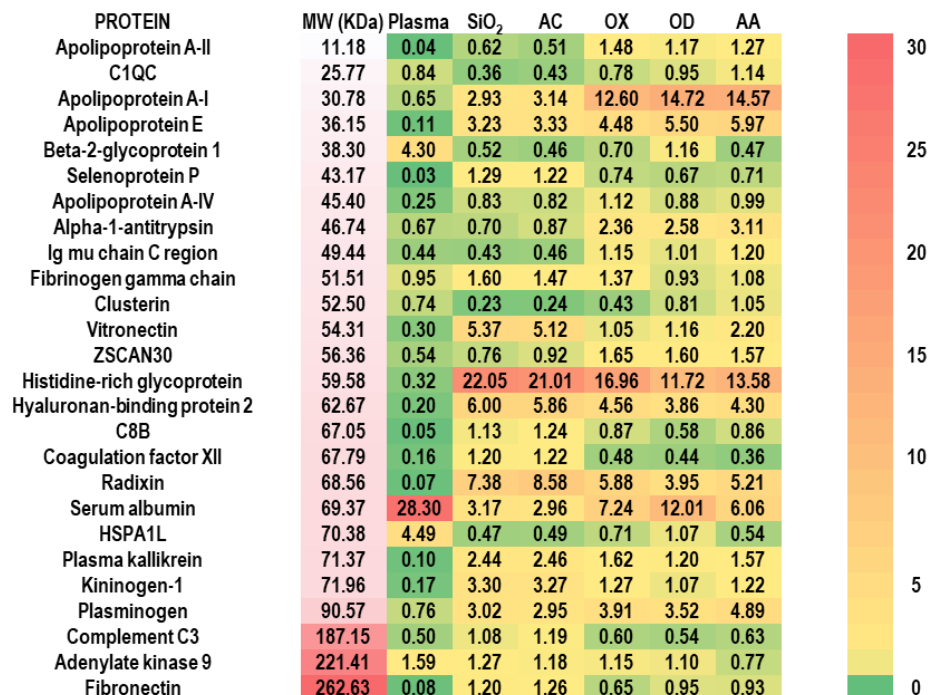

**Figure S7.** Heat map of major protein components of plasma protein corona formed on PPSiNPs sorted against increasing protein molecular weight (MW).

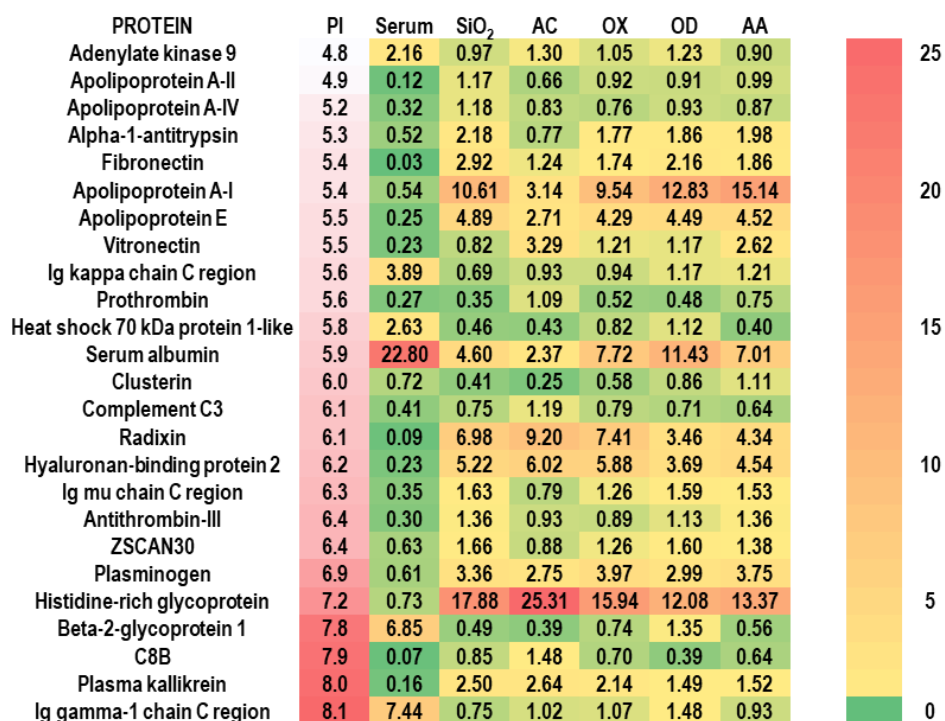

**Figure S8.** Heat map of major protein components of serum protein corona formed on PPSiNPs sorted against increasing isoelectric point (PI). The protein analysis by PI shows no correlation to the protein corona.

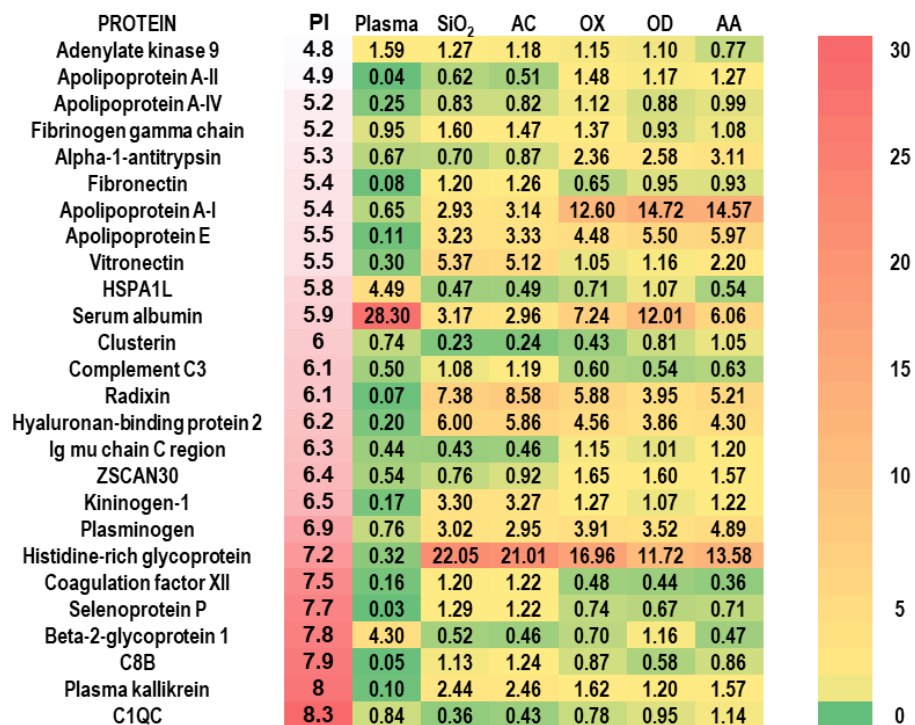

**Figure S9.** Heat map of major protein components of plasma protein corona formed on PPSiNPs sorted against increasing isoelectric point (PI). The protein analysis by PI shows no correlation to the protein corona.



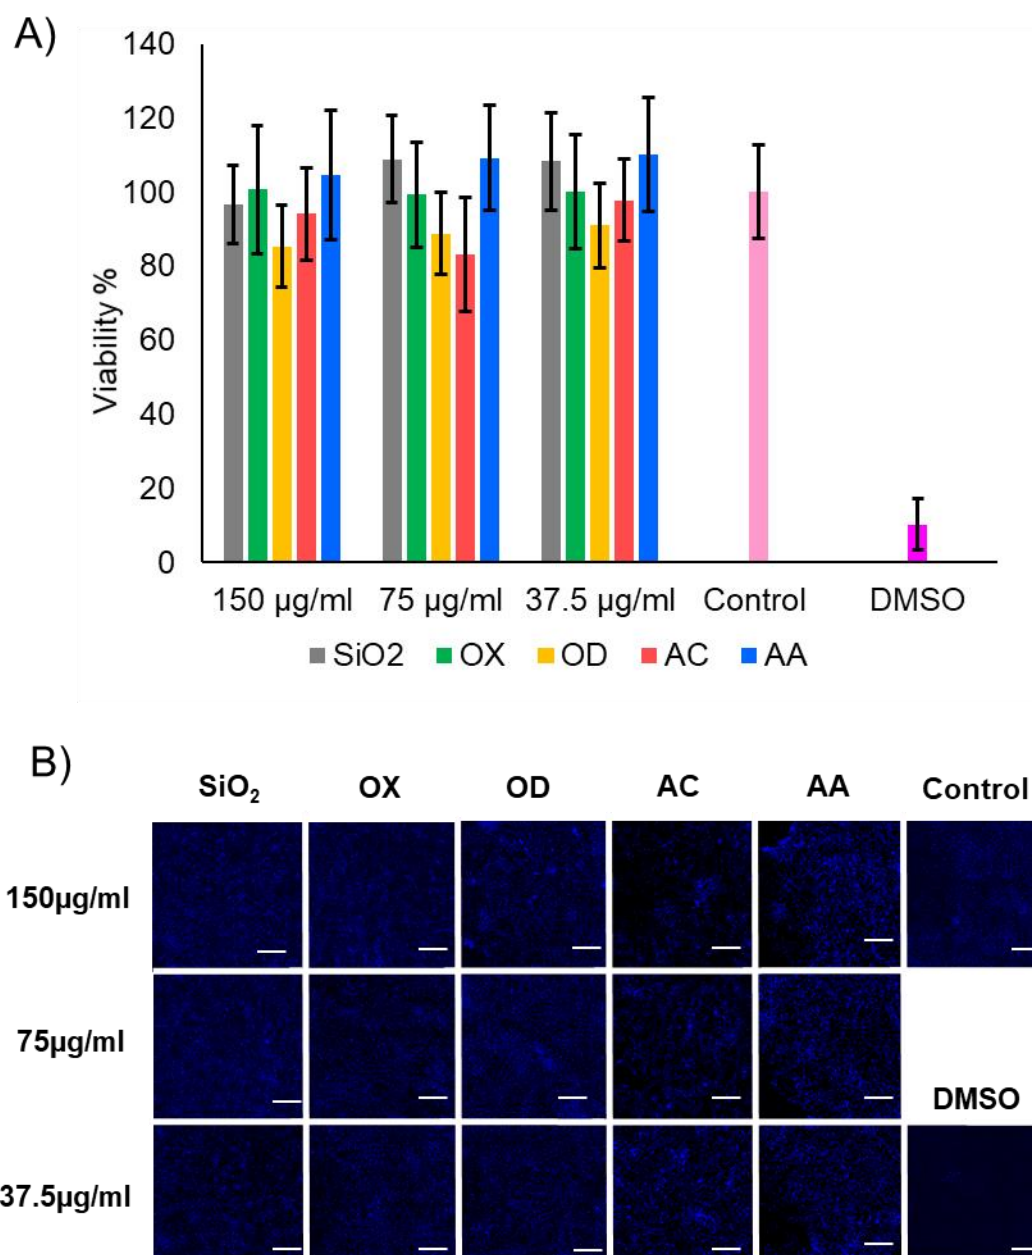

**Figure S10.** Cell viability evaluation of SiNP, POx, OD, AC, AA samples at different concentrations for 24 h on HFFs by resazurin assay A). Representative fluorescent microscopy images of cells after 24 h exposure to SiNP, POx, OD, AC, AA samples at different concentrations along with untreated and DMSO controls (scale bars 500 µm) B).



**Table S1.** List of all corona proteins identified by LC-MS. Average of the molar percentage of total protein unbound from each PPSiNPs type from plasma (P) and serum (S).

| Annotation  | Accession | Description                        | P      | Si<br>(P) | AC<br>(P) | OX<br>(P) | OD<br>(P) | AA<br>(P) | S      | Si<br>(S) | AC<br>(S) | OX<br>(S) | AA<br>(S) | OD<br>(S) |
|-------------|-----------|------------------------------------|--------|-----------|-----------|-----------|-----------|-----------|--------|-----------|-----------|-----------|-----------|-----------|
| Acute Phase | P02751    | Fibronectin                        | 0.078  | 1.197     | 1.262     | 0.653     | 0.947     | 0.934     | 0.032  | 2.921     | 1.241     | 1.738     | 1.861     | 2.163     |
| Acute Phase | P18428    | Lipopolysaccharide-binding protein | 0.021  | 0.209     | 0.200     | 0.036     | 0.088     | 0.040     | 0.045  | 0.068     | 0.259     | 0.087     | 0.086     | 0.204     |
| Acute Phase | P01009    | Alpha-1-antitrypsin                | 0.670  | 0.698     | 0.875     | 2.360     | 2.576     | 3.115     | 0.521  | 2.184     | 0.774     | 1.769     | 1.982     | 1.864     |
| Acute Phase | P00738    | Haptoglobin                        | 1.408  | 0.089     | 0.081     | 0.105     | 0.194     | 0.102     | 0.765  | 0.153     | 0.064     | 0.179     | 0.136     | 0.303     |
| Acute Phase | P02763    | Alpha-1-acid glycoprotein 1        | 1.099  | 0.068     | 0.059     | 0.048     | 0.041     | 0.036     | 0.243  | 0.052     | 0.079     | 0.048     | 0.052     | 0.046     |
| Acute Phase | P01011    | Alpha-1-antichymotrypsin           | 0.260  | 0.017     | 0.016     | 0.016     | 0.018     | 0.016     | 0.205  | 0.013     | 0.023     | 0.016     | 0.021     | 0.022     |
| Acute Phase | P01023    | Alpha-2-macroglobulin              | 0.297  | 0.523     | 0.504     | 0.509     | 0.401     | 0.487     | 0.290  | 0.259     | 0.370     | 0.290     | 0.297     | 0.233     |
| Acute Phase | P19652    | Alpha-1-acid glycoprotein 2        | 0.204  | 0.095     | 0.087     | 0.098     | 0.116     | 0.097     | 0.184  | 0.117     | 0.098     | 0.157     | 0.111     | 0.132     |
| Acute Phase | P02743    | Serum amyloid P-component          | 0.110  | 0.034     | 0.033     | 0.029     | 0.028     | 0.030     | 0.127  | 0.048     | 0.177     | 0.036     | 0.033     | 0.043     |
| Acute Phase | P02775    | Platelet basic protein             | 0.050  | 0.049     | 0.049     | 0.023     | 0.026     | 0.021     | 0.291  | 0.022     | 0.037     | 0.027     | 0.025     | 0.031     |
| Acute Phase | P02741    | C-reactive protein                 | 0.017  | 0.026     | 0.034     | 0.012     | 0.025     | 0.022     | 0.058  | 0.032     | 0.016     | 0.026     | 0.013     | 0.023     |
| Acute Phase | P00450    | Ceruloplasmin                      | 0.174  | 0.018     | 0.021     | 0.028     | 0.025     | 0.032     | 0.110  | 0.021     | 0.020     | 0.020     | 0.026     | 0.028     |
| Acute Phase | P35542    | Serum amyloid A-4 protein          | 0.320  | 0.104     | 0.124     | 0.202     | 0.227     | 0.206     | 0.169  | 0.108     | 0.053     | 0.126     | 0.105     | 0.127     |
| Acute Phase | P00739    | Haptoglobin-related protein        | 0.229  | 0.111     | 0.104     | 0.111     | 0.132     | 0.130     | 0.302  | 0.179     | 0.097     | 0.174     | 0.198     | 0.184     |
| Albumin     | P02768    | Serum albumin                      | 28.305 | 3.168     | 2.958     | 7.244     | 12.013    | 6.058     | 22.803 | 4.600     | 2.367     | 7.724     | 7.013     | 11.433    |
| Coagulation | P03952    | Plasma kallikrein                  | 0.099  | 2.444     | 2.457     | 1.620     | 1.199     | 1.566     | 0.160  | 2.498     | 2.636     | 2.142     | 1.521     | 1.490     |

|                   |        |                                    |       |        |        |        |        |        |       |        |        |        |        |        |
|-------------------|--------|------------------------------------|-------|--------|--------|--------|--------|--------|-------|--------|--------|--------|--------|--------|
| Coagulation       | Q14520 | Hyaluronan-binding protein 2       | 0.198 | 6.004  | 5.864  | 4.557  | 3.864  | 4.295  | 0.229 | 5.215  | 6.016  | 5.882  | 4.538  | 3.686  |
| Coagulation       | P04196 | Histidine-rich glycoprotein        | 0.318 | 22.055 | 21.008 | 16.960 | 11.719 | 13.575 | 0.732 | 17.884 | 25.305 | 15.943 | 13.369 | 12.079 |
| Coagulation       | P00747 | Plasminogen                        | 0.762 | 3.015  | 2.954  | 3.912  | 3.522  | 4.887  | 0.610 | 3.355  | 2.746  | 3.975  | 3.754  | 2.994  |
| Coagulation       | P00748 | Coagulation factor XII             | 0.161 | 1.201  | 1.217  | 0.477  | 0.442  | 0.359  | 0.112 | 0.311  | 0.934  | 0.402  | 0.275  | 0.298  |
| Coagulation       | P05154 | Plasma serine protease inhibitor   | 0.038 | 0.152  | 0.167  | 0.036  | 0.034  | 0.042  | 0.077 | 0.035  | 0.080  | 0.032  | 0.041  | 0.039  |
| Coagulation       | P01008 | Antithrombin-III                   | 0.283 | 0.218  | 0.232  | 0.876  | 0.872  | 0.853  | 0.300 | 1.356  | 0.926  | 0.889  | 1.359  | 1.133  |
| Coagulation       | P01042 | Kininogen-1                        | 0.169 | 3.301  | 3.272  | 1.272  | 1.071  | 1.216  | 0.427 | 0.213  | 0.687  | 0.297  | 0.252  | 0.220  |
| Coagulation       | P08697 | Alpha-2-antiplasmin                | 0.082 | 0.168  | 0.151  | 0.083  | 0.099  | 0.086  | 0.215 | 0.143  | 0.165  | 0.164  | 0.177  | 0.150  |
| Coagulation       | P23142 | Fibulin-1                          | 0.047 | 0.079  | 0.083  | 0.072  | 0.063  | 0.064  | 0.062 | 0.089  | 0.072  | 0.088  | 0.078  | 0.064  |
| Coagulation       | Q13201 | Multimerin-1                       | 1.610 | 0.159  | 0.157  | 0.152  | 0.346  | 0.171  | 1.436 | 0.114  | 0.119  | 0.212  | 0.144  | 0.296  |
| Coagulation       | P35442 | Thrombospondin-2                   | 0.007 | 0.014  | 0.012  | 0.007  | 0.006  | 0.006  | 0.012 | 0.009  | 0.027  | 0.013  | 0.010  | 0.011  |
| Coagulation       | P03951 | Coagulation factor XI              | 0.083 | 0.982  | 0.967  | 0.413  | 0.270  | 0.306  | 0.222 | 0.118  | 0.255  | 0.118  | 0.081  | 0.094  |
| Coagulation       | P02776 | Platelet factor 4                  | 0.073 | 0.033  | 0.033  | 0.030  | 0.036  | 0.031  | 0.108 | 0.097  | 0.598  | 0.088  | 0.127  | 0.140  |
| Coagulation       | P05546 | Heparin cofactor 2                 | 0.023 | 0.135  | 0.175  | 0.049  | 0.034  | 0.078  | 0.027 | 0.034  | 0.139  | 0.027  | 0.058  | 0.044  |
| Coagulation       | P02675 | Fibrinogen beta chain              | 2.493 | 0.836  | 0.953  | 0.539  | 0.793  | 0.698  | 1.999 | 0.403  | 0.891  | 0.661  | 0.612  | 0.661  |
| Coagulation       | Q96IY4 | Carboxypeptidase B2                | 0.051 | 0.056  | 0.051  | 0.037  | 0.030  | 0.033  | 0.070 | 0.083  | 0.107  | 0.088  | 0.117  | 0.104  |
| Coagulation       | P00734 | Prothrombin                        | 0.097 | 0.064  | 0.062  | 0.076  | 0.067  | 0.072  | 0.268 | 0.351  | 1.089  | 0.516  | 0.749  | 0.485  |
| Coagulation       | P02679 | Fibrinogen gamma chain             | 0.948 | 1.604  | 1.471  | 1.369  | 0.929  | 1.080  | 0.108 | 0.039  | 0.029  | 0.033  | 0.063  | 0.041  |
| Coagulation       | P12259 | Coagulation factor V               | 0.100 | 0.092  | 0.106  | 0.122  | 0.099  | 0.104  | 0.300 | 0.146  | 0.108  | 0.062  | 0.089  | 0.098  |
| Coagulation       | P02671 | Fibrinogen alpha chain             | 0.717 | 0.501  | 0.542  | 0.568  | 0.409  | 0.527  | 0.252 | 0.095  | 0.079  | 0.096  | 0.086  | 0.101  |
| Complement system | P07358 | Complement component C8 beta chain | 0.049 | 1.134  | 1.238  | 0.872  | 0.585  | 0.858  | 0.066 | 0.852  | 1.476  | 0.702  | 0.641  | 0.393  |
| Complement system | P0C0L4 | Complement C4-A                    | 0.037 | 0.213  | 0.204  | 0.206  | 0.176  | 0.185  | 0.062 | 0.331  | 0.186  | 0.272  | 0.255  | 0.246  |
| Complement system | P0C0L5 | Complement C4-B                    | 0.099 | 0.576  | 0.552  | 0.556  | 0.475  | 0.499  | 0.169 | 0.894  | 0.503  | 0.735  | 0.688  | 0.664  |

|                   |        |                                       |       |       |       |       |       |       |       |       |       |       |       |       |
|-------------------|--------|---------------------------------------|-------|-------|-------|-------|-------|-------|-------|-------|-------|-------|-------|-------|
| Complement system | P01024 | Complement C3                         | 0.498 | 1.079 | 1.192 | 0.596 | 0.537 | 0.633 | 0.406 | 0.746 | 1.195 | 0.792 | 0.642 | 0.711 |
| Complement system | Q03591 | Complement factor H-related protein 1 | 0.062 | 0.433 | 0.469 | 0.098 | 0.091 | 0.085 | 0.058 | 0.088 | 0.450 | 0.098 | 0.065 | 0.072 |
| Complement system | P02748 | Complement component C9               | 0.022 | 0.010 | 0.011 | 0.007 | 0.007 | 0.006 | 0.021 | 0.007 | 0.010 | 0.009 | 0.018 | 0.012 |
| Complement system | P36980 | Complement factor H-related protein 2 | 0.128 | 0.893 | 0.968 | 0.203 | 0.187 | 0.176 | 0.120 | 0.181 | 0.927 | 0.203 | 0.135 | 0.148 |
| Complement system | P13671 | Complement component C6               | 0.026 | 0.289 | 0.248 | 0.147 | 0.153 | 0.170 | 0.079 | 0.196 | 0.201 | 0.152 | 0.155 | 0.139 |
| Complement system | P05155 | Plasma protease C1 inhibitor          | 0.157 | 0.383 | 0.416 | 0.174 | 0.155 | 0.143 | 0.064 | 0.124 | 0.236 | 0.135 | 0.100 | 0.116 |
| Complement system | P02730 | Band 3 anion transport protein        | 0.000 | 0.000 | 0.000 | 0.000 | 0.000 | 0.000 | 0.000 | 0.000 | 0.000 | 0.000 | 0.000 | 0.000 |
| Complement system | P02745 | Complement C1q subcomponent subunit A | 0.082 | 0.231 | 0.222 | 0.116 | 0.103 | 0.093 | 0.206 | 0.161 | 0.265 | 0.187 | 0.151 | 0.166 |
| Complement system | P02747 | Complement C1q subcomponent subunit C | 0.839 | 0.358 | 0.429 | 0.782 | 0.946 | 1.137 | 0.617 | 0.806 | 0.520 | 0.713 | 0.874 | 0.987 |
| Complement system | P07360 | Complement component C8 gamma chain   | 0.013 | 0.028 | 0.024 | 0.014 | 0.011 | 0.011 | 0.011 | 0.012 | 0.030 | 0.019 | 0.016 | 0.016 |
| Complement system | P00751 | Complement factor B                   | 0.017 | 0.149 | 0.148 | 0.055 | 0.057 | 0.075 | 0.075 | 0.048 | 0.047 | 0.030 | 0.044 | 0.040 |
| Complement system | P04003 | C4b-binding protein alpha chain       | 0.132 | 0.077 | 0.084 | 0.108 | 0.092 | 0.120 | 0.063 | 0.196 | 0.084 | 0.181 | 0.182 | 0.153 |
| Complement system | P09871 | Complement C1s subcomponent           | 0.088 | 0.077 | 0.081 | 0.156 | 0.190 | 0.173 | 0.381 | 0.175 | 0.102 | 0.139 | 0.172 | 0.171 |
| Complement system | P00736 | Complement C1r subcomponent           | 0.034 | 0.007 | 0.006 | 0.008 | 0.006 | 0.007 | 0.018 | 0.006 | 0.008 | 0.004 | 0.006 | 0.005 |

|                   |                                                                  |                                       |       |       |       |       |       |       |       |       |       |       |       |       |
|-------------------|------------------------------------------------------------------|---------------------------------------|-------|-------|-------|-------|-------|-------|-------|-------|-------|-------|-------|-------|
| Complement system | Q9BXR6                                                           | Complement factor H-related protein 5 | 1.386 | 0.181 | 0.198 | 0.267 | 0.395 | 0.253 | 0.802 | 0.249 | 0.180 | 0.301 | 0.222 | 0.394 |
| Complement system | P02746                                                           | Complement C1q subcomponent subunit B | 0.266 | 0.237 | 0.236 | 0.084 | 0.091 | 0.050 | 0.360 | 0.112 | 0.323 | 0.162 | 0.112 | 0.159 |
| Complement system | P00746                                                           | Complement factor D                   | 0.026 | 0.024 | 0.023 | 0.023 | 0.021 | 0.021 | 0.043 | 0.027 | 0.022 | 0.025 | 0.032 | 0.029 |
| Complement system | P08603                                                           | Complement factor H                   | 0.920 | 0.314 | 0.338 | 0.468 | 0.473 | 0.406 | 0.420 | 0.322 | 0.344 | 0.333 | 0.233 | 0.351 |
| Immunoglobulins   | P01764<br>P01768                                                 | Immunoglobulin heavy variable 3-23    | 0.020 | 0.003 | 0.003 | 0.004 | 0.004 | 0.003 | 0.044 | 0.004 | 0.003 | 0.004 | 0.006 | 0.006 |
| Immunoglobulins   | P0CG05<br>A0M8Q6<br>P0CF74<br>P0CG04<br>P0CG06                   | Ig lambda-2 chain C regions           | 0.294 | 0.060 | 0.051 | 0.039 | 0.039 | 0.030 | 0.994 | 0.052 | 0.076 | 0.093 | 0.100 | 0.104 |
| Immunoglobulins   | P01876                                                           | Ig alpha-1 chain C region             | 1.809 | 0.493 | 0.483 | 0.557 | 0.473 | 0.499 | 2.989 | 0.555 | 0.674 | 0.661 | 0.772 | 0.690 |
| Immunoglobulins   | P01871                                                           | Ig mu chain C region                  | 0.445 | 0.427 | 0.463 | 1.153 | 1.009 | 1.199 | 0.354 | 1.630 | 0.786 | 1.262 | 1.528 | 1.593 |
| Immunoglobulins   | A0A0C4DH72<br>A0A0C4DH73<br>P01597<br>P01599<br>P01611<br>P04432 | Immunoglobulin kappa variable 1-6     | 0.116 | 0.011 | 0.012 | 0.011 | 0.022 | 0.011 | 0.108 | 0.026 | 0.029 | 0.025 | 0.031 | 0.034 |
| Immunoglobulins   | P01624<br>A0A0C4DH55                                             | Immunoglobulin kappa variable 3-15    | 0.075 | 0.026 | 0.028 | 0.021 | 0.022 | 0.020 | 0.137 | 0.031 | 0.023 | 0.030 | 0.032 | 0.031 |
| Immunoglobulins   | P01825<br>A0A0C4DH41<br>P01824<br>P06331                         | Immunoglobulin heavy variable 4-59    | 0.086 | 0.112 | 0.144 | 0.132 | 0.169 | 0.188 | 0.099 | 0.199 | 0.098 | 0.137 | 0.132 | 0.140 |

|                 |                                                  |                                     |       |       |       |       |       |       |       |       |       |       |       |       |
|-----------------|--------------------------------------------------|-------------------------------------|-------|-------|-------|-------|-------|-------|-------|-------|-------|-------|-------|-------|
| Immunoglobulins | P01767                                           | Immunoglobulin heavy variable 3-53  | 0.037 | 0.022 | 0.018 | 0.012 | 0.012 | 0.011 | 0.145 | 0.014 | 0.035 | 0.014 | 0.020 | 0.022 |
| Immunoglobulins | P01877                                           | Ig alpha-2 chain C region           | 0.167 | 0.109 | 0.091 | 0.094 | 0.070 | 0.076 | 0.234 | 0.098 | 0.110 | 0.077 | 0.105 | 0.095 |
| Immunoglobulins | P01594<br>P01593                                 | Immunoglobulin kappa variable 1-33  | 0.051 | 0.000 | 0.000 | 0.001 | 0.000 | 0.000 | 0.004 | 0.000 | 0.003 | 0.000 | 0.002 | 0.002 |
| Immunoglobulins | P04220                                           | Ig mu heavy chain disease protein   | 0.174 | 0.243 | 0.237 | 0.255 | 0.313 | 0.295 | 0.408 | 0.556 | 0.418 | 0.624 | 0.885 | 0.980 |
| Immunoglobulins | A0A075B6P5<br>P01615                             | Immunoglobulin kappa variable 2-28  | 0.411 | 0.068 | 0.069 | 0.046 | 0.060 | 0.055 | 0.534 | 0.090 | 0.069 | 0.096 | 0.157 | 0.139 |
| Immunoglobulins | P01717                                           | Immunoglobulin lambda variable 3-25 | 0.040 | 0.033 | 0.033 | 0.024 | 0.026 | 0.028 | 0.170 | 0.016 | 0.033 | 0.030 | 0.023 | 0.031 |
| Immunoglobulins | A0A0B4J1X5<br>A0A075B6Q5<br>A0A0C4DH42<br>P01772 | Immunoglobulin heavy variable 3-74  | 0.002 | 0.000 | 0.000 | 0.001 | 0.001 | 0.001 | 0.007 | 0.001 | 0.001 | 0.001 | 0.001 | 0.001 |
| Immunoglobulins | P04433<br>A0A0A0MRZ8                             | Immunoglobulin kappa variable 3-11  | 0.112 | 0.161 | 0.138 | 0.044 | 0.049 | 0.087 | 0.115 | 0.056 | 0.117 | 0.069 | 0.138 | 0.074 |
| Immunoglobulins | P01718                                           | Immunoglobulin lambda variable 3-27 | 0.018 | 0.009 | 0.008 | 0.019 | 0.019 | 0.021 | 0.027 | 0.039 | 0.019 | 0.034 | 0.034 | 0.042 |
| Immunoglobulins | P01880                                           | Ig delta chain C region             | 0.002 | 0.036 | 0.026 | 0.031 | 0.015 | 0.019 | 0.046 | 0.028 | 0.052 | 0.031 | 0.027 | 0.020 |
| Immunoglobulins | A0A0A0MS15                                       | Immunoglobulin heavy variable 3-49  | 0.001 | 0.000 | 0.000 | 0.000 | 0.000 | 0.000 | 0.004 | 0.000 | 0.000 | 0.000 | 0.001 | 0.000 |
| Immunoglobulins | A0A0C4DH38                                       | Immunoglobulin heavy variable 5-51  | 0.046 | 0.028 | 0.029 | 0.021 | 0.023 | 0.020 | 0.051 | 0.017 | 0.033 | 0.024 | 0.026 | 0.029 |
| Immunoglobulins | P01591                                           | Immunoglobulin J chain              | 0.028 | 0.018 | 0.019 | 0.013 | 0.016 | 0.016 | 0.046 | 0.019 | 0.018 | 0.024 | 0.028 | 0.028 |
| Immunoglobulins | A0A0B4J1V1                                       | Immunoglobulin heavy variable 3-21  | 0.059 | 0.006 | 0.006 | 0.007 | 0.008 | 0.007 | 0.036 | 0.013 | 0.014 | 0.016 | 0.020 | 0.018 |
| Immunoglobulins | P01857                                           | Ig gamma-1 chain C region           | 5.482 | 0.743 | 0.768 | 0.584 | 0.594 | 0.476 | 7.441 | 0.750 | 1.020 | 1.067 | 0.929 | 1.477 |

|                 |                                                    |                                        |       |       |       |        |        |        |       |        |       |       |        |        |
|-----------------|----------------------------------------------------|----------------------------------------|-------|-------|-------|--------|--------|--------|-------|--------|-------|-------|--------|--------|
| Immunoglobulins | P01619<br>A0A0C4DH25                               | Immunoglobulin kappa<br>variable 3-20  | 0.140 | 0.043 | 0.042 | 0.034  | 0.034  | 0.035  | 0.107 | 0.061  | 0.058 | 0.066 | 0.071  | 0.072  |
| Immunoglobulins | P01860                                             | Ig gamma-3 chain C<br>region           | 0.491 | 0.188 | 0.185 | 0.123  | 0.117  | 0.089  | 0.301 | 0.137  | 0.247 | 0.211 | 0.187  | 0.256  |
| Immunoglobulins | P01861                                             | Ig gamma-4 chain C<br>region           | 0.057 | 0.023 | 0.023 | 0.023  | 0.019  | 0.023  | 0.016 | 0.012  | 0.015 | 0.017 | 0.022  | 0.020  |
| Immunoglobulins | P01859                                             | Ig gamma-2 chain C<br>region           | 0.905 | 0.130 | 0.125 | 0.080  | 0.081  | 0.065  | 0.352 | 0.239  | 0.299 | 0.314 | 0.438  | 0.362  |
| Immunoglobulins | P01834                                             | Ig kappa chain C region                | 3.142 | 0.483 | 0.458 | 0.426  | 0.420  | 0.316  | 3.892 | 0.694  | 0.929 | 0.936 | 1.207  | 1.171  |
| Immunoglobulins | P01780<br>A0A0B4J1X8<br>P01762<br>P01763<br>P01782 | Immunoglobulin heavy<br>variable 3-7   | 0.096 | 0.018 | 0.021 | 0.020  | 0.020  | 0.021  | 0.077 | 0.043  | 0.038 | 0.048 | 0.062  | 0.058  |
| Immunoglobulins | A0A075B6I0                                         | Immunoglobulin lambda<br>variable 8-61 | 1.188 | 0.051 | 0.050 | 0.048  | 0.190  | 0.079  | 1.038 | 0.128  | 0.025 | 0.147 | 0.101  | 0.324  |
| Lipoproteins    | P02649                                             | Apolipoprotein E                       | 0.107 | 3.231 | 3.326 | 4.476  | 5.500  | 5.969  | 0.247 | 4.891  | 2.713 | 4.285 | 4.519  | 4.485  |
| Lipoproteins    | P02647<br>Q9P2D0                                   | Apolipoprotein A                       | 0.654 | 2.928 | 3.143 | 12.596 | 14.719 | 14.569 | 0.543 | 10.608 | 3.140 | 9.541 | 15.139 | 12.826 |
| Lipoproteins    | O14791                                             | Apolipoprotein L1                      | 0.045 | 0.088 | 0.088 | 0.159  | 0.162  | 0.181  | 0.045 | 0.149  | 0.089 | 0.144 | 0.191  | 0.167  |
| Lipoproteins    | P02652                                             | Apolipoprotein A-II                    | 0.044 | 0.625 | 0.512 | 1.475  | 1.168  | 1.272  | 0.117 | 1.175  | 0.659 | 0.919 | 0.986  | 0.914  |
| Lipoproteins    | Q6Q788                                             | Apolipoprotein A-V                     | 0.058 | 0.092 | 0.098 | 0.137  | 0.074  | 0.094  | 0.032 | 0.205  | 0.246 | 0.138 | 0.078  | 0.083  |
| Lipoproteins    | P02749                                             | Beta-2-glycoprotein 1                  | 4.301 | 0.517 | 0.464 | 0.697  | 1.160  | 0.472  | 6.853 | 0.494  | 0.388 | 0.745 | 0.556  | 1.351  |
| Lipoproteins    | P10909                                             | Clusterin                              | 0.737 | 0.227 | 0.242 | 0.434  | 0.814  | 1.046  | 0.718 | 0.410  | 0.245 | 0.576 | 1.115  | 0.856  |
| Lipoproteins    | P06727                                             | Apolipoprotein A-IV                    | 0.246 | 0.832 | 0.817 | 1.122  | 0.881  | 0.993  | 0.320 | 1.175  | 0.828 | 0.763 | 0.872  | 0.934  |
| Lipoproteins    | P27169                                             | Serum<br>paraoxonase/arylesterase<br>1 | 0.271 | 0.121 | 0.108 | 0.248  | 0.298  | 0.265  | 0.086 | 0.259  | 0.137 | 0.329 | 0.363  | 0.354  |
| Lipoproteins    | P05090                                             | Apolipoprotein D                       | 0.015 | 0.099 | 0.100 | 0.103  | 0.077  | 0.083  | 0.085 | 0.126  | 0.147 | 0.120 | 0.109  | 0.102  |

|                         |        |                                                                    |       |       |       |       |       |       |       |       |       |       |       |       |
|-------------------------|--------|--------------------------------------------------------------------|-------|-------|-------|-------|-------|-------|-------|-------|-------|-------|-------|-------|
| Lipoproteins            | O95445 | Apolipoprotein M                                                   | 0.026 | 0.025 | 0.027 | 0.056 | 0.058 | 0.058 | 0.040 | 0.055 | 0.036 | 0.062 | 0.066 | 0.054 |
| Lipoproteins            | P08519 | Apolipoprotein(a)                                                  | 0.023 | 0.048 | 0.046 | 0.041 | 0.039 | 0.046 | 0.072 | 0.032 | 0.030 | 0.051 | 0.058 | 0.069 |
| Lipoproteins            | P04114 | Apolipoprotein B-100                                               | 1.511 | 0.741 | 0.774 | 0.907 | 0.807 | 0.708 | 0.856 | 0.915 | 0.897 | 0.889 | 0.734 | 0.858 |
| Lipoproteins            | P55056 | Apolipoprotein C-IV                                                | 0.016 | 0.043 | 0.039 | 0.052 | 0.037 | 0.033 | 0.149 | 0.004 | 0.007 | 0.005 | 0.008 | 0.011 |
| Other Plasma components | Q9NV56 | MRG/MORF4L-binding protein                                         | 0.004 | 0.028 | 0.026 | 0.020 | 0.016 | 0.017 | 0.007 | 0.030 | 0.028 | 0.022 | 0.016 | 0.016 |
| Other Plasma components | P49908 | Selenoprotein P                                                    | 0.033 | 1.293 | 1.218 | 0.735 | 0.671 | 0.711 | 0.078 | 0.899 | 0.834 | 0.906 | 0.727 | 0.684 |
| Other Plasma components | P35241 | Radixin                                                            | 0.067 | 7.382 | 8.577 | 5.881 | 3.954 | 5.211 | 0.095 | 6.980 | 9.200 | 7.410 | 4.339 | 3.464 |
| Other Plasma components | Q8IWL2 | Pulmonary surfactant-associated protein A1                         | 0.032 | 0.003 | 0.005 | 0.000 | 0.004 | 0.001 | 0.060 | 0.001 | 0.002 | 0.004 | 0.001 | 0.005 |
| Other Plasma components | P25311 | Zinc-alpha-2-glycoprotein                                          | 0.074 | 0.007 | 0.006 | 0.003 | 0.002 | 0.001 | 0.097 | 0.002 | 0.007 | 0.002 | 0.002 | 0.003 |
| Other Plasma components | Q8IUC0 | Keratin-associated protein 13-1                                    | 0.000 | 0.009 | 0.002 | 0.051 | 0.040 | 0.059 | 0.001 | 0.009 | 0.011 | 0.027 | 0.086 | 0.037 |
| Other Plasma components | P82970 | High mobility group nucleosome-binding domain-containing protein 5 | 0.000 | 0.138 | 0.165 | 0.113 | 0.044 | 0.097 | 0.001 | 0.069 | 0.272 | 0.097 | 0.046 | 0.040 |
| Other Plasma components | P22352 | Glutathione peroxidase 3                                           | 0.008 | 0.008 | 0.009 | 0.020 | 0.019 | 0.034 | 0.010 | 0.013 | 0.013 | 0.026 | 0.046 | 0.020 |
| Other Plasma components | Q86W11 | Zinc finger and SCAN domain-containing protein 30                  | 0.535 | 0.758 | 0.923 | 1.646 | 1.595 | 1.570 | 0.631 | 1.658 | 0.884 | 1.260 | 1.378 | 1.599 |
| Other Plasma components | P36955 | Pigment epithelium-derived factor                                  | 0.017 | 0.096 | 0.091 | 0.024 | 0.024 | 0.020 | 0.029 | 0.028 | 0.057 | 0.026 | 0.020 | 0.029 |
| Other Plasma components | Q99497 | Protein deglycase DJ-1                                             | 0.053 | 0.008 | 0.006 | 0.015 | 0.027 | 0.009 | 0.058 | 0.007 | 0.003 | 0.014 | 0.008 | 0.026 |



|                         |                  |                                                                          |       |       |       |       |       |       |       |       |       |       |       |       |
|-------------------------|------------------|--------------------------------------------------------------------------|-------|-------|-------|-------|-------|-------|-------|-------|-------|-------|-------|-------|
| Other Plasma components | P57796           | Calcium-binding protein 4                                                | 0.005 | 0.083 | 0.073 | 0.209 | 0.107 | 0.106 | 0.030 | 0.112 | 0.114 | 0.082 | 0.099 | 0.069 |
| Other Plasma components | Q96E39           | RNA binding motif protein, X-linked-like-1                               | 0.006 | 0.018 | 0.022 | 0.027 | 0.034 | 0.050 | 0.015 | 0.050 | 0.025 | 0.060 | 0.050 | 0.044 |
| Other Plasma components | A6NFZ4           | Protein FAM24A                                                           | 0.141 | 0.302 | 0.201 | 0.234 | 0.208 | 0.296 | 0.064 | 0.447 | 0.151 | 0.510 | 0.252 | 0.318 |
| Other Plasma components | Q99969           | Retinoic acid receptor responder protein 2                               | 0.036 | 0.199 | 0.191 | 0.092 | 0.089 | 0.075 | 0.070 | 0.058 | 0.124 | 0.049 | 0.057 | 0.060 |
| Other Plasma components | P13639           | Elongation factor 2                                                      | 0.004 | 0.032 | 0.043 | 0.115 | 0.144 | 0.168 | 0.006 | 0.069 | 0.082 | 0.109 | 0.116 | 0.083 |
| Other Plasma components | Q96QA5           | Gasdermin-A                                                              | 0.072 | 0.472 | 0.494 | 0.634 | 0.535 | 0.793 | 0.403 | 0.450 | 0.510 | 0.617 | 0.618 | 0.347 |
| Other Plasma components | Q6ZS10           | C-type lectin domain family 17, member A                                 | 0.386 | 0.118 | 0.135 | 0.309 | 0.411 | 0.428 | 0.458 | 0.208 | 0.109 | 0.196 | 0.322 | 0.314 |
| Other Plasma components | P11142<br>P54652 | Heat shock cognate 71 kDa protein                                        | 0.021 | 0.081 | 0.089 | 0.161 | 0.140 | 0.152 | 0.059 | 0.181 | 0.126 | 0.105 | 0.119 | 0.112 |
| Other Plasma components | Q01469<br>A8MUU1 | Fatty acid-binding protein, epidermal                                    | 0.037 | 0.011 | 0.012 | 0.012 | 0.018 | 0.014 | 0.084 | 0.011 | 0.015 | 0.012 | 0.010 | 0.018 |
| Other Plasma components | P09211           | Glutathione S-transferase P                                              | 0.173 | 0.005 | 0.005 | 0.016 | 0.013 | 0.011 | 0.122 | 0.028 | 0.016 | 0.019 | 0.013 | 0.030 |
| Other Plasma components | P31040           | Succinate dehydrogenase [ubiquinone] flavoprotein subunit, mitochondrial | 0.000 | 0.057 | 0.044 | 0.000 | 0.073 | 0.041 | 0.014 | 0.099 | 0.001 | 0.127 | 0.074 | 0.090 |
| Other Plasma components | P23284           | Peptidyl-prolyl cis-trans isomerase B                                    | 0.010 | 0.009 | 0.010 | 0.005 | 0.008 | 0.007 | 0.053 | 0.003 | 0.007 | 0.002 | 0.005 | 0.007 |
| Other Plasma components | P02790           | Hemopexin                                                                | 0.517 | 0.187 | 0.188 | 0.097 | 0.115 | 0.111 | 0.632 | 0.096 | 0.181 | 0.107 | 0.109 | 0.118 |

|                         |                  |                                                                      |       |       |       |       |       |       |       |       |       |       |       |       |
|-------------------------|------------------|----------------------------------------------------------------------|-------|-------|-------|-------|-------|-------|-------|-------|-------|-------|-------|-------|
| Other Plasma components | P19827           | Inter-alpha-trypsin inhibitor heavy chain H1                         | 0.148 | 0.044 | 0.043 | 0.033 | 0.023 | 0.023 | 0.109 | 0.032 | 0.025 | 0.040 | 0.029 | 0.056 |
| Other Plasma components | Q5T700           | Low-density lipoprotein receptor class A domain-containing protein 1 | 0.050 | 0.506 | 0.662 | 0.614 | 0.322 | 0.416 | 0.033 | 0.489 | 0.747 | 0.163 | 0.345 | 0.332 |
| Other Plasma components | P04217           | Alpha-1B-glycoprotein                                                | 0.097 | 0.253 | 0.252 | 0.654 | 0.736 | 0.940 | 0.119 | 0.936 | 0.305 | 0.706 | 0.898 | 0.746 |
| Other Plasma components | P24844           | Myosin regulatory light polypeptide 9                                | 0.010 | 0.046 | 0.038 | 0.027 | 0.028 | 0.013 | 0.012 | 0.019 | 0.042 | 0.044 | 0.050 | 0.042 |
| Other Plasma components | Q9BQE6           | LBH domain-containing protein 1                                      | 0.000 | 0.004 | 0.006 | 0.007 | 0.007 | 0.009 | 0.009 | 0.002 | 0.008 | 0.007 | 0.009 | 0.005 |
| Other Plasma components | P24592           | Insulin-like growth factor-binding protein 6                         | 0.033 | 0.060 | 0.082 | 0.183 | 0.187 | 0.177 | 0.056 | 0.184 | 0.081 | 0.133 | 0.156 | 0.169 |
| Other Plasma components | P53634           | Dipeptidyl peptidase 1                                               | 0.103 | 0.002 | 0.001 | 0.002 | 0.004 | 0.001 | 0.181 | 0.010 | 0.003 | 0.004 | 0.011 | 0.021 |
| Other Plasma components | Q6ZVL6           | UPF0606 protein KIAA1549L                                            | 0.111 | 0.126 | 0.135 | 0.086 | 0.100 | 0.084 | 0.137 | 0.160 | 0.200 | 0.109 | 0.107 | 0.124 |
| Other Plasma components | P22528<br>P35321 | Cornifin-B                                                           | 0.051 | 0.131 | 0.131 | 0.067 | 0.048 | 0.086 | 0.031 | 0.052 | 0.128 | 0.040 | 0.063 | 0.035 |
| Other Plasma components | P02750           | Leucine-rich alpha-2-glycoprotein                                    | 0.010 | 0.000 | 0.000 | 0.000 | 0.000 | 0.000 | 0.019 | 0.000 | 0.000 | 0.000 | 0.000 | 0.000 |
| Other Plasma components | Q08345           | Epithelial discoidin domain-containing receptor 1                    | 0.029 | 0.003 | 0.004 | 0.002 | 0.006 | 0.002 | 0.025 | 0.004 | 0.001 | 0.005 | 0.002 | 0.006 |
| Other Plasma components | P07339           | Cathepsin D                                                          | 0.019 | 0.143 | 0.160 | 0.126 | 0.089 | 0.105 | 0.135 | 0.122 | 0.203 | 0.156 | 0.146 | 0.090 |
| Other Plasma components | Q99687           | Homeobox protein Meis3                                               | 0.009 | 0.046 | 0.039 | 0.009 | 0.009 | 0.009 | 0.017 | 0.015 | 0.047 | 0.013 | 0.012 | 0.013 |

|                         |                                      |                                                                                    |       |       |       |       |       |       |       |       |       |       |       |       |
|-------------------------|--------------------------------------|------------------------------------------------------------------------------------|-------|-------|-------|-------|-------|-------|-------|-------|-------|-------|-------|-------|
| Other Plasma components | Q8N8B7                               | Transcription elongation factor A N-terminal and central domain-containing protein | 0.148 | 0.003 | 0.002 | 0.000 | 0.001 | 0.001 | 0.061 | 0.000 | 0.001 | 0.002 | 0.000 | 0.000 |
| Other Plasma components | P48594                               | Serpin B4                                                                          | 0.460 | 0.089 | 0.086 | 0.195 | 0.246 | 0.203 | 0.644 | 0.245 | 0.095 | 0.215 | 0.193 | 0.231 |
| Other Plasma components | P07355<br>A6NMY6                     | Annexin A2                                                                         | 0.003 | 0.002 | 0.002 | 0.003 | 0.002 | 0.003 | 0.013 | 0.001 | 0.002 | 0.001 | 0.001 | 0.001 |
| Other Plasma components | P39060                               | Collagen alpha-1(XVIII) chain                                                      | 0.008 | 0.093 | 0.085 | 0.071 | 0.054 | 0.067 | 0.093 | 0.098 | 0.043 | 0.055 | 0.061 | 0.038 |
| Other Plasma components | P10599                               | Thioredoxin                                                                        | 0.000 | 0.007 | 0.010 | 0.012 | 0.035 | 0.039 | 0.008 | 0.079 | 0.002 | 0.091 | 0.097 | 0.096 |
| Other Plasma components | P84077<br>P18085<br>P61204<br>P84085 | ADP-ribosylation factor 1                                                          | 0.005 | 0.003 | 0.003 | 0.002 | 0.003 | 0.002 | 0.025 | 0.007 | 0.002 | 0.002 | 0.005 | 0.008 |
| Other Plasma components | Q86UC2                               | Radial spoke head protein 3 homolog                                                | 0.000 | 0.002 | 0.000 | 0.000 | 0.000 | 0.000 | 0.000 | 0.000 | 0.005 | 0.001 | 0.000 | 0.000 |
| Other Plasma components | P02774                               | Vitamin D-binding protein                                                          | 1.284 | 0.192 | 0.193 | 0.383 | 0.410 | 0.348 | 1.605 | 0.306 | 0.260 | 0.394 | 0.434 | 0.464 |
| Other Plasma components | O15182                               | Centrin-3                                                                          | 0.001 | 0.013 | 0.023 | 0.000 | 0.008 | 0.003 | 0.007 | 0.004 | 0.005 | 0.007 | 0.002 | 0.011 |
| Other Plasma components | P10646                               | Tissue factor pathway inhibitor                                                    | 0.003 | 0.011 | 0.010 | 0.005 | 0.003 | 0.004 | 0.012 | 0.001 | 0.008 | 0.001 | 0.001 | 0.001 |
| Other Plasma components | O14960                               | Leukocyte cell-derived chemotaxin-2                                                | 0.047 | 0.259 | 0.286 | 0.093 | 0.105 | 0.141 | 0.142 | 0.080 | 0.132 | 0.097 | 0.079 | 0.068 |
| Other Plasma components | O75381                               | Peroxisomal membrane protein PEX14                                                 | 0.000 | 0.014 | 0.011 | 0.000 | 0.001 | 0.004 | 0.000 | 0.001 | 0.020 | 0.003 | 0.014 | 0.000 |

|                         |                                      |                                               |       |       |       |       |       |       |       |       |       |       |       |       |
|-------------------------|--------------------------------------|-----------------------------------------------|-------|-------|-------|-------|-------|-------|-------|-------|-------|-------|-------|-------|
| Other Plasma components | O15335                               | Chondroadherin                                | 0.001 | 0.010 | 0.006 | 0.003 | 0.002 | 0.001 | 0.014 | 0.005 | 0.007 | 0.001 | 0.004 | 0.001 |
| Other Plasma components | P01019                               | Angiotensinogen                               | 0.179 | 0.056 | 0.045 | 0.046 | 0.056 | 0.033 | 0.169 | 0.073 | 0.068 | 0.079 | 0.066 | 0.084 |
| Other Plasma components | Q8NEM0                               | Microcephalin                                 | 0.015 | 0.040 | 0.043 | 0.016 | 0.013 | 0.012 | 0.031 | 0.016 | 0.028 | 0.021 | 0.008 | 0.009 |
| Other Plasma components | P61626                               | Lysozyme C                                    | 0.002 | 0.053 | 0.049 | 0.014 | 0.009 | 0.005 | 0.020 | 0.007 | 0.025 | 0.003 | 0.002 | 0.004 |
| Other Plasma components | P68104<br>Q05639<br>Q5VTE0           | Elongation factor 1-alpha<br>1                | 0.004 | 0.004 | 0.005 | 0.003 | 0.004 | 0.004 | 0.018 | 0.003 | 0.003 | 0.002 | 0.004 | 0.004 |
| Other Plasma components | P62979<br>P0CG47<br>P0CG48<br>P62987 | Ubiquitin-40S ribosomal<br>protein S27a       | 0.024 | 0.080 | 0.084 | 0.082 | 0.074 | 0.097 | 0.048 | 0.054 | 0.073 | 0.059 | 0.076 | 0.057 |
| Other Plasma components | P49711                               | Transcriptional repressor<br>CTCF             | 0.037 | 0.003 | 0.006 | 0.009 | 0.007 | 0.007 | 0.063 | 0.003 | 0.016 | 0.002 | 0.002 | 0.006 |
| Other Plasma components | P43652                               | Afamin                                        | 0.014 | 0.090 | 0.106 | 0.104 | 0.149 | 0.157 | 0.180 | 0.141 | 0.107 | 0.099 | 0.137 | 0.121 |
| Other Plasma components | Q9UKZ9                               | Procollagen C-<br>endopeptidase enhancer<br>2 | 0.013 | 0.002 | 0.002 | 0.001 | 0.001 | 0.001 | 0.015 | 0.003 | 0.002 | 0.002 | 0.001 | 0.002 |
| Other Plasma components | P27482                               | Calmodulin-like protein<br>3                  | 0.032 | 0.053 | 0.048 | 0.017 | 0.016 | 0.027 | 0.021 | 0.014 | 0.045 | 0.015 | 0.037 | 0.016 |
| Other Plasma components | Q02325                               | Plasminogen-like protein<br>B                 | 0.000 | 0.002 | 0.003 | 0.001 | 0.004 | 0.004 | 0.006 | 0.014 | 0.000 | 0.003 | 0.003 | 0.010 |
| Other Plasma components | P02787                               | Serotransferrin                               | 1.454 | 0.419 | 0.410 | 0.350 | 0.378 | 0.348 | 1.646 | 0.180 | 0.183 | 0.197 | 0.166 | 0.258 |

|                         |                                      |                                              |       |       |       |       |       |       |       |       |       |       |       |       |
|-------------------------|--------------------------------------|----------------------------------------------|-------|-------|-------|-------|-------|-------|-------|-------|-------|-------|-------|-------|
| Other Plasma components | Q5VSP4                               | Putative lipocalin 1-like protein 1          | 0.031 | 0.004 | 0.004 | 0.015 | 0.020 | 0.013 | 0.044 | 0.007 | 0.003 | 0.010 | 0.011 | 0.021 |
| Other Plasma components | Q13705                               | Activin receptor type-2B                     | 0.000 | 0.014 | 0.014 | 0.006 | 0.007 | 0.007 | 0.013 | 0.003 | 0.011 | 0.004 | 0.011 | 0.008 |
| Other Plasma components | Q9NX94                               | WW domain binding protein 1-like             | 0.154 | 0.038 | 0.032 | 0.146 | 0.062 | 0.047 | 0.078 | 0.016 | 0.020 | 0.025 | 0.021 | 0.039 |
| Other Plasma components | P17936                               | Insulin-like growth factor-binding protein 3 | 0.023 | 0.054 | 0.059 | 0.037 | 0.032 | 0.046 | 0.017 | 0.023 | 0.047 | 0.037 | 0.042 | 0.031 |
| Other Plasma components | P28300                               | Protein-lysine 6-oxidase                     | 0.008 | 0.001 | 0.000 | 0.000 | 0.004 | 0.000 | 0.007 | 0.001 | 0.001 | 0.000 | 0.000 | 0.000 |
| Other Plasma components | P04080                               | Cystatin-B                                   | 0.007 | 0.003 | 0.003 | 0.002 | 0.003 | 0.003 | 0.008 | 0.002 | 0.003 | 0.002 | 0.003 | 0.004 |
| Other Plasma components | P68871<br>P02100<br>P69891<br>P69892 | Hemoglobin subunit beta                      | 0.043 | 0.025 | 0.025 | 0.020 | 0.020 | 0.025 | 0.038 | 0.009 | 0.008 | 0.020 | 0.046 | 0.036 |
| Other Plasma components | P14923                               | Junction plakoglobin                         | 0.001 | 0.010 | 0.002 | 0.000 | 0.000 | 0.000 | 0.004 | 0.000 | 0.014 | 0.002 | 0.002 | 0.001 |
| Other Plasma components | Q7Z5L7                               | Podocan                                      | 0.000 | 0.001 | 0.001 | 0.000 | 0.000 | 0.000 | 0.000 | 0.000 | 0.000 | 0.000 | 0.000 | 0.000 |
| Other Plasma components | Q8IUD6                               | E3 ubiquitin-protein ligase RNF135           | 0.000 | 0.002 | 0.001 | 0.001 | 0.000 | 0.000 | 0.002 | 0.001 | 0.001 | 0.001 | 0.001 | 0.000 |
| Other Plasma components | P29373                               | Cellular retinoic acid-binding protein 2     | 0.012 | 0.004 | 0.004 | 0.002 | 0.003 | 0.003 | 0.113 | 0.017 | 0.003 | 0.010 | 0.004 | 0.008 |
| Other Plasma components | P31151<br>Q86SG5                     | Protein S100-A7                              | 0.010 | 0.016 | 0.016 | 0.023 | 0.025 | 0.025 | 0.047 | 0.023 | 0.012 | 0.018 | 0.017 | 0.029 |
| Other Plasma components | O14544                               | Suppressor of cytokine signaling 6           | 0.032 | 0.097 | 0.094 | 0.049 | 0.044 | 0.058 | 0.064 | 0.054 | 0.066 | 0.044 | 0.073 | 0.052 |

|                         |        |                                                                        |       |       |       |       |       |       |       |       |       |       |       |       |
|-------------------------|--------|------------------------------------------------------------------------|-------|-------|-------|-------|-------|-------|-------|-------|-------|-------|-------|-------|
| Other Plasma components | P08567 | Pleckstrin                                                             | 0.061 | 0.082 | 0.086 | 0.105 | 0.081 | 0.112 | 0.063 | 0.118 | 0.077 | 0.098 | 0.082 | 0.070 |
| Other Plasma components | Q8N699 | Myc target protein 1                                                   | 0.100 | 0.015 | 0.012 | 0.038 | 0.062 | 0.021 | 0.250 | 0.022 | 0.008 | 0.034 | 0.027 | 0.070 |
| Other Plasma components | Q8N108 | Mesoderm induction early response protein 1                            | 0.008 | 0.014 | 0.008 | 0.019 | 0.021 | 0.015 | 0.007 | 0.055 | 0.023 | 0.036 | 0.117 | 0.020 |
| Other Plasma components | P35858 | Insulin-like growth factor-binding protein complex acid labile subunit | 0.099 | 0.100 | 0.084 | 0.096 | 0.067 | 0.054 | 0.394 | 0.160 | 0.189 | 0.149 | 0.121 | 0.146 |
| Other Plasma components | P10075 | Zinc finger protein GLI4                                               | 0.012 | 0.081 | 0.093 | 0.099 | 0.058 | 0.075 | 0.014 | 0.116 | 0.132 | 0.061 | 0.066 | 0.077 |
| Other Plasma components | Q9NQ30 | Endothelial cell-specific molecule 1                                   | 0.000 | 0.028 | 0.030 | 0.000 | 0.003 | 0.006 | 0.011 | 0.001 | 0.005 | 0.005 | 0.017 | 0.006 |
| Other Plasma components | P60174 | Triosephosphate isomerase                                              | 0.031 | 0.016 | 0.016 | 0.041 | 0.039 | 0.037 | 0.018 | 0.056 | 0.021 | 0.039 | 0.047 | 0.047 |
| Other Plasma components | P01344 | Insulin-like growth factor II                                          | 0.022 | 0.004 | 0.003 | 0.003 | 0.007 | 0.005 | 0.010 | 0.000 | 0.004 | 0.000 | 0.000 | 0.002 |
| Other Plasma components | P24593 | Insulin-like growth factor-binding protein 5                           | 0.005 | 0.021 | 0.021 | 0.008 | 0.007 | 0.009 | 0.004 | 0.001 | 0.008 | 0.002 | 0.001 | 0.002 |
| Other Plasma components | P02765 | Alpha-2-HS-glycoprotein                                                | 0.428 | 0.057 | 0.054 | 0.103 | 0.169 | 0.081 | 0.524 | 0.047 | 0.056 | 0.109 | 0.087 | 0.232 |
| Other Plasma components | P05109 | Protein S100-A8                                                        | 0.150 | 0.039 | 0.044 | 0.047 | 0.051 | 0.042 | 0.140 | 0.036 | 0.041 | 0.044 | 0.041 | 0.055 |
| Other Plasma components | P05089 | Arginase-1                                                             | 0.003 | 0.011 | 0.010 | 0.010 | 0.014 | 0.016 | 0.012 | 0.003 | 0.006 | 0.005 | 0.013 | 0.012 |
| Other Plasma components | Q00889 | Pregnancy-specific beta-1-glycoprotein 6                               | 2.905 | 0.131 | 0.125 | 0.100 | 0.391 | 0.159 | 1.534 | 0.256 | 0.066 | 0.406 | 0.249 | 0.535 |

|                         |                                      |                                              |       |       |       |       |       |       |       |       |       |       |       |       |
|-------------------------|--------------------------------------|----------------------------------------------|-------|-------|-------|-------|-------|-------|-------|-------|-------|-------|-------|-------|
| Other Plasma components | P31947<br>P61981<br>P62258<br>Q04917 | 14-3-3 protein sigma                         | 0.000 | 0.001 | 0.000 | 0.002 | 0.000 | 0.003 | 0.003 | 0.003 | 0.002 | 0.003 | 0.003 | 0.002 |
| Other Plasma components | P28715                               | DNA repair protein complementing XP-G cells  | 0.000 | 0.000 | 0.001 | 0.000 | 0.000 | 0.000 | 0.000 | 0.000 | 0.000 | 0.000 | 0.000 | 0.000 |
| Other Plasma components | P31949                               | Protein S100-A11                             | 0.000 | 0.001 | 0.001 | 0.001 | 0.002 | 0.001 | 0.002 | 0.001 | 0.001 | 0.003 | 0.000 | 0.001 |
| Other Plasma components | P31267                               | Homeobox protein Hox-A6                      | 0.097 | 0.037 | 0.040 | 0.041 | 0.061 | 0.059 | 0.092 | 0.040 | 0.042 | 0.035 | 0.048 | 0.055 |
| Other Plasma components | Q5TCS8                               | Adenylate kinase 9                           | 1.592 | 1.273 | 1.185 | 1.150 | 1.101 | 0.774 | 2.159 | 0.967 | 1.302 | 1.050 | 0.905 | 1.226 |
| Other Plasma components | P15311                               | Ezrin                                        | 0.005 | 0.001 | 0.000 | 0.000 | 0.001 | 0.001 | 0.009 | 0.001 | 0.000 | 0.005 | 0.002 | 0.001 |
| Other Plasma components | Q9BXN1                               | Asporin                                      | 0.000 | 0.001 | 0.001 | 0.000 | 0.000 | 0.000 | 0.006 | 0.003 | 0.002 | 0.002 | 0.003 | 0.002 |
| Other Plasma components | Q8TDM0                               | Breast carcinoma-amplified sequence 4        | 0.001 | 0.017 | 0.020 | 0.000 | 0.000 | 0.000 | 0.004 | 0.000 | 0.004 | 0.000 | 0.000 | 0.000 |
| Other Plasma components | Q14624                               | Inter-alpha-trypsin inhibitor heavy chain H4 | 0.112 | 0.317 | 0.266 | 0.209 | 0.215 | 0.165 | 0.097 | 0.106 | 0.068 | 0.093 | 0.092 | 0.090 |
| Other Plasma components | P14136                               | Glial fibrillary acidic protein              | 0.423 | 0.039 | 0.032 | 0.034 | 0.064 | 0.027 | 0.256 | 0.056 | 0.023 | 0.064 | 0.028 | 0.065 |
| Other Plasma components | P29508                               | Serpin B3                                    | 0.082 | 0.038 | 0.043 | 0.032 | 0.064 | 0.058 | 0.095 | 0.094 | 0.026 | 0.079 | 0.043 | 0.058 |
| Other Plasma components | P32119                               | Peroxiredoxin-2                              | 0.001 | 0.000 | 0.001 | 0.006 | 0.007 | 0.007 | 0.012 | 0.002 | 0.000 | 0.002 | 0.007 | 0.009 |
| Other Plasma components | P07996<br>P49746                     | Thrombospondin-1                             | 0.106 | 0.142 | 0.137 | 0.115 | 0.084 | 0.097 | 0.076 | 0.053 | 0.102 | 0.049 | 0.044 | 0.044 |



|                         |        |                                                                                                      |       |       |       |       |       |       |       |       |       |       |       |       |
|-------------------------|--------|------------------------------------------------------------------------------------------------------|-------|-------|-------|-------|-------|-------|-------|-------|-------|-------|-------|-------|
| Other Plasma components | P80723 | Brain acid soluble protein 1                                                                         | 1.877 | 0.164 | 0.182 | 0.258 | 0.413 | 0.276 | 1.295 | 0.218 | 0.196 | 0.318 | 0.236 | 0.388 |
| Other Plasma components | P10720 | Platelet factor 4 variant                                                                            | 0.003 | 0.001 | 0.001 | 0.001 | 0.001 | 0.001 | 0.004 | 0.004 | 0.024 | 0.003 | 0.005 | 0.006 |
| Other Plasma components | Q7Z4G4 | tRNA (guanine(10)-N2)-methyltransferase homolog                                                      | 0.008 | 0.009 | 0.008 | 0.004 | 0.004 | 0.003 | 0.040 | 0.002 | 0.005 | 0.003 | 0.003 | 0.002 |
| Other Plasma components | P60484 | Phosphatidylinositol 3,4,5-trisphosphate 3-phosphatase and dual-specificity protein phosphatase PTEN | 0.156 | 0.018 | 0.015 | 0.023 | 0.017 | 0.012 | 0.203 | 0.019 | 0.042 | 0.031 | 0.031 | 0.027 |
| Other Plasma components | P51888 | Prolargin                                                                                            | 0.003 | 0.006 | 0.006 | 0.005 | 0.003 | 0.004 | 0.009 | 0.017 | 0.006 | 0.011 | 0.006 | 0.005 |
| Other Plasma components | P13284 | Gamma-interferon-inducible lysosomal thiol reductase                                                 | 1.649 | 0.154 | 0.168 | 0.193 | 0.369 | 0.163 | 1.058 | 0.132 | 0.086 | 0.220 | 0.112 | 0.290 |
| Other Plasma components | P02042 | Hemoglobin subunit delta                                                                             | 0.002 | 0.003 | 0.005 | 0.001 | 0.001 | 0.001 | 0.002 | 0.000 | 0.000 | 0.000 | 0.001 | 0.001 |
| Other Plasma components | P69905 | Hemoglobin subunit alpha                                                                             | 0.038 | 0.027 | 0.030 | 0.034 | 0.036 | 0.034 | 0.079 | 0.026 | 0.015 | 0.024 | 0.031 | 0.031 |
| Other Plasma components | P20742 | Pregnancy zone protein                                                                               | 0.025 | 0.051 | 0.056 | 0.053 | 0.040 | 0.057 | 0.069 | 0.061 | 0.087 | 0.041 | 0.038 | 0.040 |
| Other Plasma components | P80188 | Neutrophil gelatinase-associated lipocalin                                                           | 0.001 | 0.001 | 0.001 | 0.001 | 0.000 | 0.000 | 0.005 | 0.000 | 0.000 | 0.000 | 0.000 | 0.000 |
| Other Plasma components | Q7L273 | BTB/POZ domain-containing protein KCTD9                                                              | 1.158 | 0.165 | 0.146 | 0.115 | 0.124 | 0.082 | 0.271 | 0.143 | 0.197 | 0.198 | 0.183 | 0.280 |

|                         |        |                                                               |       |       |       |       |       |       |       |       |       |       |       |       |
|-------------------------|--------|---------------------------------------------------------------|-------|-------|-------|-------|-------|-------|-------|-------|-------|-------|-------|-------|
| Other Plasma components | Q15828 | Cystatin-M                                                    | 0.013 | 0.034 | 0.030 | 0.028 | 0.018 | 0.020 | 0.019 | 0.022 | 0.045 | 0.020 | 0.019 | 0.016 |
| Other Plasma components | O75223 | Gamma-glutamylcyclotransferase                                | 0.029 | 0.019 | 0.016 | 0.014 | 0.024 | 0.020 | 0.008 | 0.026 | 0.013 | 0.026 | 0.035 | 0.027 |
| Other Plasma components | P34931 | Heat shock 70 kDa protein 1-like                              | 4.493 | 0.474 | 0.494 | 0.715 | 1.067 | 0.540 | 2.633 | 0.459 | 0.432 | 0.820 | 0.398 | 1.119 |
| Other Plasma components | P36952 | Serpin B5                                                     | 0.002 | 0.000 | 0.000 | 0.000 | 0.000 | 0.000 | 0.010 | 0.000 | 0.000 | 0.000 | 0.001 | 0.001 |
| Other Plasma components | Q9NYJ1 | Cytochrome c oxidase assembly factor 4 homolog, mitochondrial | 0.165 | 0.140 | 0.151 | 0.099 | 0.090 | 0.075 | 0.206 | 0.039 | 0.073 | 0.050 | 0.050 | 0.049 |
| Other Plasma components | Q5T197 | DC-STAMP domain-containing protein 1                          | 0.023 | 0.023 | 0.027 | 0.015 | 0.013 | 0.012 | 0.089 | 0.007 | 0.034 | 0.008 | 0.010 | 0.015 |
| Other Plasma components | P15924 | Desmoplakin                                                   | 0.025 | 0.001 | 0.001 | 0.001 | 0.001 | 0.001 | 0.009 | 0.002 | 0.003 | 0.001 | 0.001 | 0.002 |
| Other Plasma components | Q9UK55 | Protein Z-dependent protease inhibitor                        | 0.001 | 0.024 | 0.007 | 0.004 | 0.002 | 0.003 | 0.073 | 0.005 | 0.008 | 0.015 | 0.003 | 0.009 |
| Other Plasma components | Q14116 | Interleukin-18                                                | 1.010 | 0.082 | 0.099 | 0.142 | 0.182 | 0.094 | 0.362 | 0.116 | 0.081 | 0.105 | 0.072 | 0.210 |
| Other Plasma components | O43278 | Kunitz-type protease inhibitor 1                              | 0.027 | 0.023 | 0.023 | 0.016 | 0.024 | 0.025 | 0.030 | 0.017 | 0.015 | 0.025 | 0.012 | 0.019 |
| Other Plasma components | Q9BXU0 | Testis-expressed protein 12                                   | 0.000 | 0.000 | 0.000 | 0.000 | 0.000 | 0.000 | 0.000 | 0.000 | 0.000 | 0.000 | 0.000 | 0.000 |
| Other Plasma components | P19971 | Thymidine phosphorylase                                       | 0.000 | 0.000 | 0.000 | 0.000 | 0.000 | 0.000 | 0.003 | 0.000 | 0.000 | 0.000 | 0.000 | 0.000 |
| Other Plasma components | Q5JR12 | Protein phosphatase 1J                                        | 0.000 | 0.000 | 0.000 | 0.000 | 0.000 | 0.000 | 0.033 | 0.000 | 0.000 | 0.000 | 0.000 | 0.000 |
| Other Plasma components | Q8N5X7 | Eukaryotic translation initiation factor 4E type 3            | 0.092 | 0.049 | 0.048 | 0.056 | 0.051 | 0.038 | 0.114 | 0.052 | 0.119 | 0.058 | 0.048 | 0.064 |

|                         |                  |                                                                             |       |       |       |       |       |       |       |       |       |       |       |       |
|-------------------------|------------------|-----------------------------------------------------------------------------|-------|-------|-------|-------|-------|-------|-------|-------|-------|-------|-------|-------|
| Other Plasma components | Q9NTU7           | Cerebellin-4                                                                | 0.001 | 0.003 | 0.003 | 0.012 | 0.011 | 0.018 | 0.001 | 0.011 | 0.008 | 0.017 | 0.013 | 0.012 |
| Other Plasma components | P23528<br>Q9Y281 | Cofilin-1                                                                   | 0.038 | 0.024 | 0.025 | 0.020 | 0.024 | 0.018 | 0.023 | 0.006 | 0.010 | 0.009 | 0.011 | 0.019 |
| Other Plasma components | P57768           | Sorting nexin-16                                                            | 0.000 | 0.000 | 0.000 | 0.000 | 0.000 | 0.000 | 0.009 | 0.000 | 0.000 | 0.000 | 0.000 | 0.000 |
| Other Plasma components | P04792           | Heat shock protein beta-1                                                   | 0.018 | 0.009 | 0.007 | 0.009 | 0.006 | 0.008 | 0.029 | 0.051 | 0.194 | 0.050 | 0.076 | 0.064 |
| Other Plasma components | Q9NY97           | N-acetylglucosaminide<br>beta-1,3-N-<br>acetylglucosaminyltransf<br>erase 2 | 0.000 | 0.000 | 0.000 | 0.000 | 0.000 | 0.000 | 0.000 | 0.000 | 0.000 | 0.000 | 0.000 | 0.000 |
| Other Plasma components | P01040           | Cystatin-A                                                                  | 0.000 | 0.001 | 0.000 | 0.000 | 0.001 | 0.001 | 0.009 | 0.000 | 0.001 | 0.001 | 0.000 | 0.000 |
| Other Plasma components | P02760           | Protein AMBP                                                                | 0.049 | 0.028 | 0.027 | 0.036 | 0.022 | 0.030 | 0.083 | 0.043 | 0.049 | 0.046 | 0.043 | 0.042 |
| Other Plasma components | P58550           | Putative FXFD domain-<br>containing ion transport<br>regulator 8            | 0.021 | 0.030 | 0.036 | 0.049 | 0.030 | 0.051 | 1.715 | 0.030 | 0.055 | 0.041 | 0.035 | 0.043 |
| Other Plasma components | Q2TV78           | Putative macrophage<br>stimulating 1-like protein                           | 0.028 | 0.028 | 0.030 | 0.025 | 0.027 | 0.025 | 0.081 | 0.046 | 0.027 | 0.031 | 0.032 | 0.040 |
| Other Plasma components | A8K2U0           | Alpha-2-macroglobulin-<br>like protein 1                                    | 0.010 | 0.035 | 0.029 | 0.015 | 0.007 | 0.014 | 0.107 | 0.046 | 0.051 | 0.048 | 0.038 | 0.041 |
| Other Plasma components | Q5TAB7           | Protein ripply2                                                             | 0.019 | 0.049 | 0.052 | 0.028 | 0.037 | 0.049 | 0.008 | 0.010 | 0.014 | 0.001 | 0.006 | 0.004 |
| Other Plasma components | Q9UL33           | Trafficking protein<br>particle complex subunit<br>2-like protein           | 0.101 | 0.076 | 0.070 | 0.064 | 0.074 | 0.068 | 0.065 | 0.088 | 0.114 | 0.137 | 0.203 | 0.215 |

|                         |                                      |                                                        |       |       |       |       |       |       |       |       |       |       |       |       |
|-------------------------|--------------------------------------|--------------------------------------------------------|-------|-------|-------|-------|-------|-------|-------|-------|-------|-------|-------|-------|
| Other Plasma components | P61278                               | Somatostatin                                           | 0.000 | 0.001 | 0.001 | 0.003 | 0.001 | 0.001 | 0.000 | 0.003 | 0.000 | 0.001 | 0.000 | 0.001 |
| Other Plasma components | Q14CZ7                               | FAST kinase domain-containing protein 3, mitochondrial | 0.100 | 0.098 | 0.100 | 0.064 | 0.049 | 0.055 | 0.149 | 0.051 | 0.075 | 0.051 | 0.039 | 0.050 |
| Other Plasma components | P0CG38                               | POTE ankyrin domain family member I                    | 0.054 | 0.157 | 0.143 | 0.163 | 0.102 | 0.121 | 0.085 | 0.029 | 0.040 | 0.015 | 0.016 | 0.017 |
| Other Plasma components | P01236                               | Prolactin                                              | 0.050 | 0.069 | 0.066 | 0.059 | 0.042 | 0.051 | 0.106 | 0.001 | 0.000 | 0.000 | 0.002 | 0.002 |
| Other Plasma components | P02766                               | Transthyretin                                          | 0.319 | 0.135 | 0.127 | 0.070 | 0.103 | 0.112 | 0.304 | 0.190 | 0.141 | 0.219 | 0.238 | 0.167 |
| Other Plasma components | P00338                               | L-lactate dehydrogenase A chain                        | 0.022 | 0.011 | 0.015 | 0.014 | 0.014 | 0.016 | 0.029 | 0.005 | 0.006 | 0.007 | 0.007 | 0.010 |
| Other Plasma components | P47929                               | Galectin-7                                             | 0.015 | 0.036 | 0.034 | 0.030 | 0.026 | 0.027 | 0.211 | 0.037 | 0.040 | 0.035 | 0.031 | 0.027 |
| Other Plasma components | P19823                               | Inter-alpha-trypsin inhibitor heavy chain H2           | 0.216 | 0.053 | 0.057 | 0.077 | 0.074 | 0.103 | 0.303 | 0.222 | 0.430 | 0.287 | 0.434 | 0.305 |
| Other Plasma components | P31944                               | Caspase-14                                             | 0.023 | 0.018 | 0.017 | 0.017 | 0.020 | 0.016 | 0.049 | 0.033 | 0.016 | 0.018 | 0.026 | 0.022 |
| Other Plasma components | Q6ZRG5                               | Putative uncharacterized protein FLJ43944              | 0.005 | 0.004 | 0.005 | 0.005 | 0.007 | 0.006 | 0.029 | 0.010 | 0.009 | 0.008 | 0.009 | 0.011 |
| Other Plasma components | Q14244                               | Ensconsin                                              | 0.017 | 0.015 | 0.012 | 0.013 | 0.005 | 0.010 | 0.008 | 0.000 | 0.001 | 0.000 | 0.000 | 0.001 |
| Tissue Leakage          | P05452                               | Tetranectin                                            | 0.054 | 0.060 | 0.060 | 0.025 | 0.023 | 0.023 | 0.123 | 0.025 | 0.083 | 0.022 | 0.027 | 0.031 |
| Tissue Leakage          | P35579                               | Myosin-9                                               | 0.219 | 0.017 | 0.020 | 0.021 | 0.039 | 0.016 | 0.873 | 0.014 | 0.012 | 0.018 | 0.019 | 0.044 |
| Tissue Leakage          | P62736<br>P63267<br>P68032<br>P68133 | Actin, aortic smooth muscle                            | 0.497 | 0.047 | 0.049 | 0.101 | 0.147 | 0.065 | 0.705 | 0.060 | 0.049 | 0.103 | 0.069 | 0.142 |

|                |                                      |                                              |       |       |       |       |       |       |       |       |       |       |       |       |
|----------------|--------------------------------------|----------------------------------------------|-------|-------|-------|-------|-------|-------|-------|-------|-------|-------|-------|-------|
| Tissue Leakage | P35908                               | Keratin, type II<br>cytoskeletal 2 epidermal | 0.062 | 0.414 | 0.467 | 0.333 | 0.277 | 0.347 | 0.141 | 0.583 | 0.423 | 0.429 | 0.372 | 0.334 |
| Tissue Leakage | P06396                               | Gelsolin                                     | 0.029 | 0.506 | 0.481 | 0.210 | 0.168 | 0.148 | 0.060 | 0.094 | 0.422 | 0.155 | 0.116 | 0.166 |
| Tissue Leakage | P26038                               | Moesin                                       | 0.022 | 0.682 | 0.656 | 0.835 | 0.813 | 0.714 | 0.137 | 0.396 | 0.495 | 0.501 | 0.345 | 0.377 |
| Tissue Leakage | P13645<br>Q7Z3Y7<br>Q7Z3Y8<br>Q7Z3Z0 | Keratin, type I<br>cytoskeletal 10           | 0.041 | 0.216 | 0.157 | 0.167 | 0.129 | 0.188 | 0.057 | 0.179 | 0.202 | 0.174 | 0.143 | 0.131 |
| Tissue Leakage | P02533                               | Keratin, type I<br>cytoskeletal 14           | 0.064 | 0.012 | 0.008 | 0.006 | 0.011 | 0.008 | 0.062 | 0.007 | 0.008 | 0.012 | 0.010 | 0.008 |
| Tissue Leakage | P04259<br>P12035<br>P12036<br>Q01546 | Keratin, type II<br>cytoskeletal 6B          | 0.088 | 0.211 | 0.208 | 0.278 | 0.307 | 0.358 | 0.135 | 0.424 | 0.296 | 0.345 | 0.431 | 0.354 |
| Tissue Leakage | P63261<br>P60709<br>Q562R1<br>Q9BYX7 | Actin, cytoplasmic 2                         | 0.055 | 0.140 | 0.164 | 0.130 | 0.098 | 0.120 | 0.062 | 0.140 | 0.138 | 0.151 | 0.094 | 0.083 |
| Tissue Leakage | P04350<br>P07437<br>P68371           | Tubulin beta-4A chain                        | 0.014 | 0.530 | 0.479 | 0.087 | 0.101 | 0.174 | 0.016 | 0.108 | 0.449 | 0.135 | 0.256 | 0.097 |
| Tissue Leakage | Q96PD5                               | N-acetylmuramoyl-L-<br>alanine amidase       | 0.114 | 0.060 | 0.059 | 0.069 | 0.123 | 0.055 | 0.128 | 0.079 | 0.046 | 0.094 | 0.057 | 0.156 |
| Tissue Leakage | P15169                               | Carboxypeptidase N<br>catalytic chain        | 0.404 | 0.264 | 0.241 | 0.309 | 0.329 | 0.286 | 0.329 | 0.273 | 0.181 | 0.263 | 0.303 | 0.292 |
| Tissue Leakage | Q71U36<br>P68363<br>P68366<br>Q13748 | Tubulin alpha-1A chain                       | 0.020 | 0.041 | 0.035 | 0.042 | 0.048 | 0.054 | 0.028 | 0.127 | 0.034 | 0.081 | 0.094 | 0.109 |

|                |                                                |                                          |       |       |       |       |       |       |       |       |       |       |       |       |
|----------------|------------------------------------------------|------------------------------------------|-------|-------|-------|-------|-------|-------|-------|-------|-------|-------|-------|-------|
|                | Q6PEY2<br>Q9BQE3<br>Q9NY65                     |                                          |       |       |       |       |       |       |       |       |       |       |       |       |
| Tissue Leakage | P04004                                         | Vitronectin                              | 0.299 | 5.373 | 5.119 | 1.046 | 1.159 | 2.203 | 0.235 | 0.821 | 3.293 | 1.213 | 2.625 | 1.172 |
| Tissue Leakage | P06702                                         | Protein S100-A9                          | 0.018 | 0.027 | 0.035 | 0.030 | 0.027 | 0.031 | 0.139 | 0.033 | 0.033 | 0.034 | 0.042 | 0.032 |
| Tissue Leakage | P03950                                         | Angiogenin                               | 0.067 | 0.105 | 0.116 | 0.096 | 0.091 | 0.103 | 0.194 | 0.126 | 0.116 | 0.103 | 0.119 | 0.104 |
| Tissue Leakage | Q04695<br>O76014<br>P08727<br>Q14525<br>Q99456 | Keratin, type I<br>cytoskeletal 17       | 0.036 | 0.027 | 0.028 | 0.023 | 0.018 | 0.019 | 0.058 | 0.019 | 0.018 | 0.016 | 0.014 | 0.019 |
| Tissue Leakage | P62937                                         | Peptidyl-prolyl cis-trans<br>isomerase A | 0.032 | 0.017 | 0.016 | 0.015 | 0.018 | 0.020 | 0.010 | 0.034 | 0.023 | 0.031 | 0.024 | 0.024 |
| Tissue Leakage | P02538                                         | Keratin, type II<br>cytoskeletal 6A      | 0.023 | 0.052 | 0.048 | 0.069 | 0.083 | 0.095 | 0.038 | 0.112 | 0.050 | 0.091 | 0.108 | 0.089 |
| Tissue Leakage | P48668<br>O95678                               | Keratin, type II<br>cytoskeletal 6C      | 0.016 | 0.037 | 0.034 | 0.049 | 0.059 | 0.068 | 0.027 | 0.080 | 0.036 | 0.064 | 0.077 | 0.063 |
| Tissue Leakage | Q9C075                                         | Keratin, type I<br>cytoskeletal 23       | 0.006 | 0.007 | 0.009 | 0.004 | 0.004 | 0.004 | 0.005 | 0.006 | 0.005 | 0.005 | 0.005 | 0.004 |
| Tissue Leakage | Q92954                                         | Proteoglycan 4                           | 0.033 | 0.786 | 0.753 | 0.091 | 0.064 | 0.046 | 0.101 | 0.117 | 0.509 | 0.142 | 0.100 | 0.136 |
| Tissue Leakage | Q5T749                                         | Keratinocyte proline-rich<br>protein     | 0.000 | 0.001 | 0.000 | 0.000 | 0.000 | 0.000 | 0.010 | 0.001 | 0.001 | 0.000 | 0.000 | 0.000 |
| Tissue Leakage | P05787                                         | Keratin, type II<br>cytoskeletal 8       | 0.005 | 0.009 | 0.008 | 0.016 | 0.022 | 0.025 | 0.007 | 0.029 | 0.009 | 0.021 | 0.029 | 0.024 |
| Tissue Leakage | Q8N1N4                                         | Keratin, type II<br>cytoskeletal 78      | 0.001 | 0.000 | 0.000 | 0.001 | 0.001 | 0.000 | 0.000 | 0.001 | 0.000 | 0.001 | 0.001 | 0.001 |
| Tissue Leakage | P04264                                         | Keratin, type II<br>cytoskeletal 1       | 0.106 | 0.175 | 0.070 | 0.080 | 0.061 | 0.060 | 0.163 | 0.070 | 0.087 | 0.078 | 0.074 | 0.100 |

|                |        |                                     |       |       |       |       |       |       |       |       |       |       |       |       |
|----------------|--------|-------------------------------------|-------|-------|-------|-------|-------|-------|-------|-------|-------|-------|-------|-------|
| Tissue Leakage | Q04756 | Hepatocyte growth factor activator  | 0.019 | 0.205 | 0.209 | 0.060 | 0.063 | 0.046 | 0.186 | 0.047 | 0.145 | 0.065 | 0.040 | 0.041 |
| Tissue Leakage | Q7Z3Y9 | Keratin, type I cytoskeletal 26     | 0.011 | 0.008 | 0.011 | 0.012 | 0.020 | 0.025 | 0.013 | 0.043 | 0.007 | 0.033 | 0.015 | 0.024 |
| Tissue Leakage | A5A3E0 | POTE ankyrin domain family member F | 0.003 | 0.002 | 0.002 | 0.001 | 0.000 | 0.000 | 0.013 | 0.002 | 0.002 | 0.001 | 0.000 | 0.000 |
| Tissue Leakage | P62805 | Histone H4                          | 0.005 | 0.004 | 0.004 | 0.002 | 0.002 | 0.002 | 0.006 | 0.002 | 0.003 | 0.004 | 0.002 | 0.002 |
| Tissue Leakage | P02788 | Lactotransferrin                    | 0.121 | 0.068 | 0.070 | 0.058 | 0.036 | 0.050 | 0.105 | 0.063 | 0.099 | 0.050 | 0.041 | 0.044 |
| Tissue Leakage | P07737 | Profilin-1                          | 0.000 | 0.000 | 0.000 | 0.000 | 0.000 | 0.000 | 0.003 | 0.000 | 0.000 | 0.000 | 0.000 | 0.000 |
| Tissue Leakage | P63104 | 14-3-3 protein zeta/delta           | 0.006 | 0.001 | 0.001 | 0.001 | 0.002 | 0.001 | 0.012 | 0.002 | 0.001 | 0.003 | 0.001 | 0.004 |
| Tissue Leakage | P08779 | Keratin, type I cytoskeletal 16     | 0.039 | 0.142 | 0.089 | 0.090 | 0.060 | 0.064 | 0.045 | 0.055 | 0.137 | 0.069 | 0.078 | 0.065 |
| Tissue Leakage | P06733 | Alpha-enolase                       | 0.085 | 0.096 | 0.086 | 0.084 | 0.103 | 0.094 | 0.083 | 0.243 | 0.095 | 0.231 | 0.173 | 0.119 |
| Tissue Leakage | P30043 | Flavin reductase (NADPH)            | 0.010 | 0.010 | 0.011 | 0.009 | 0.010 | 0.008 | 0.019 | 0.008 | 0.008 | 0.008 | 0.007 | 0.006 |
| Tissue Leakage | O00391 | Sulfhydryl oxidase 1                | 0.033 | 0.049 | 0.048 | 0.029 | 0.031 | 0.032 | 0.142 | 0.095 | 0.115 | 0.085 | 0.125 | 0.105 |
| Tissue Leakage | P19012 | Keratin, type I cytoskeletal 15     | 0.193 | 0.032 | 0.035 | 0.049 | 0.081 | 0.063 | 0.143 | 0.064 | 0.037 | 0.057 | 0.056 | 0.070 |
| Tissue Leakage | P14618 | Pyruvate kinase PKM                 | 0.002 | 0.001 | 0.001 | 0.002 | 0.001 | 0.002 | 0.011 | 0.003 | 0.002 | 0.002 | 0.002 | 0.001 |
| Tissue Leakage | P13647 | Keratin, type II cytoskeletal 5     | 0.046 | 0.013 | 0.015 | 0.017 | 0.018 | 0.017 | 0.091 | 0.034 | 0.029 | 0.028 | 0.037 | 0.033 |
| Tissue Leakage | P08729 | Keratin, type II cytoskeletal 7     | 0.175 | 0.047 | 0.042 | 0.037 | 0.033 | 0.018 | 0.309 | 0.051 | 0.054 | 0.062 | 0.054 | 0.055 |
| Tissue Leakage | Q9Y4G6 | Talin-2                             | 0.214 | 0.170 | 0.146 | 0.128 | 0.190 | 0.146 | 0.159 | 0.218 | 0.124 | 0.249 | 0.292 | 0.218 |
| Tissue Leakage | P35527 | Keratin, type I cytoskeletal 9      | 0.005 | 0.089 | 0.006 | 0.028 | 0.002 | 0.004 | 0.035 | 0.007 | 0.026 | 0.010 | 0.014 | 0.028 |
| Tissue Leakage | Q86UX7 | Fermitin family homolog 3           | 0.020 | 0.031 | 0.031 | 0.032 | 0.033 | 0.035 | 0.050 | 0.026 | 0.014 | 0.029 | 0.027 | 0.022 |



|                |        |                                                    |       |       |       |       |       |       |       |       |       |       |       |       |
|----------------|--------|----------------------------------------------------|-------|-------|-------|-------|-------|-------|-------|-------|-------|-------|-------|-------|
| Tissue Leakage | Q15113 | Procollagen C-<br>endopeptidase enhancer<br>1      | 0.126 | 0.098 | 0.111 | 0.065 | 0.089 | 0.090 | 0.058 | 0.093 | 0.102 | 0.087 | 0.068 | 0.069 |
| Tissue Leakage | O43866 | CD5 antigen-like                                   | 0.061 | 0.047 | 0.051 | 0.044 | 0.048 | 0.048 | 0.112 | 0.052 | 0.039 | 0.061 | 0.067 | 0.068 |
| Tissue Leakage | Q7Z794 | Keratin, type II<br>cytoskeletal 1b                | 0.311 | 0.051 | 0.050 | 0.077 | 0.085 | 0.058 | 0.144 | 0.101 | 0.047 | 0.084 | 0.086 | 0.111 |
| Tissue Leakage | Q9Y490 | Talin-1                                            | 0.337 | 0.117 | 0.114 | 0.055 | 0.056 | 0.063 | 0.209 | 0.061 | 0.102 | 0.067 | 0.146 | 0.083 |
| Tissue Leakage | Q15323 | Keratin, type I cuticular<br>Ha1                   | 0.420 | 0.080 | 0.067 | 0.079 | 0.120 | 0.089 | 0.420 | 0.250 | 0.207 | 0.240 | 0.322 | 0.270 |
| Tissue Leakage | P04406 | Glyceraldehyde-3-<br>phosphate<br>dehydrogenase    | 0.043 | 0.048 | 0.040 | 0.053 | 0.055 | 0.058 | 0.138 | 0.006 | 0.008 | 0.005 | 0.010 | 0.009 |
| Tissue Leakage | P47755 | F-actin-capping protein<br>subunit alpha-2         | 0.037 | 0.041 | 0.038 | 0.053 | 0.033 | 0.043 | 0.125 | 0.005 | 0.005 | 0.006 | 0.008 | 0.007 |
| Tissue Leakage | P27105 | Erythrocyte band 7<br>integral membrane<br>protein | 0.000 | 0.000 | 0.000 | 0.000 | 0.000 | 0.000 | 0.005 | 0.000 | 0.000 | 0.000 | 0.002 | 0.001 |
| Tissue Leakage | P04075 | Fructose-bisphosphate<br>aldolase A                | 0.001 | 0.013 | 0.010 | 0.003 | 0.005 | 0.002 | 0.040 | 0.000 | 0.004 | 0.001 | 0.004 | 0.001 |
| Tissue Leakage | Q5XKE5 | Keratin, type II<br>cytoskeletal 79                | 0.073 | 0.090 | 0.096 | 0.075 | 0.077 | 0.082 | 0.391 | 0.077 | 0.068 | 0.056 | 0.058 | 0.063 |
| Tissue Leakage | Q92764 | Keratin, type I cuticular<br>Ha5                   | 0.149 | 0.013 | 0.013 | 0.012 | 0.008 | 0.003 | 0.188 | 0.034 | 0.050 | 0.060 | 0.078 | 0.052 |
